# Supplementary material for: Prevalence and prognostic associations of cardiac abnormalities among hospitalized patients with COVID-19: a systematic review and meta-analysis
Source: PubMed Central journal article supplement (PMC8055982; doi:10.1038/s41598-021-87961-x), 2021-04-19
Supplement: 41598_2021_87961_MOESM1_ESM.pdf [file 41598_2021_87961_MOESM1_ESM.pdf]

Prevalence and Prognostic Associations of Cardiac Abnormalities Among Hospitalized Patients with COVID-19 – A Systematic Review and Meta-Analysis

Louie F. Dy1,4\*, Ryan C.V. Lintao1, Cynthia P. Cordero2, Ian Theodore G. Cabaluna3 and Leonila F. Dans2,3

1College of Medicine, University of the Philippines Manila, Manila 1000 Philippines

2Department of Clinical Epidemiology, College of Medicine, University of the Philippines Manila, Manila 1000 Philippines

3Asia Pacific Center for Evidence-Based Healthcare, Manila 1000 Philippines

4University of the Philippines COVID-19 Pandemic Response Team, University of the Philippines Resilience Institute, Manila, Philippines

\*Corresponding author, E-mail: lfdy@up.edu.ph

SM1\_Included-Articles.csv

| Key      | Item Type   | Publication | Author        | Title                                         | Publication | ISBN | ISSN      | DOI                             | Url                                       | Abstract N  | Date     | Date Added | Date Modified | Access Date | Pages               | Num Page | Issue | Volume | Number O |
|----------|-------------|-------------|---------------|-----------------------------------------------|-------------|------|-----------|---------------------------------|-------------------------------------------|-------------|----------|------------|---------------|-------------|---------------------|----------|-------|--------|----------|
| N2DYA5FN | journalArti | 2020        | Cao, Jiatian  | Myocardia Theranostics                        |             |      | 1838-7640 | 10.7150/thno.47980              | Introducti                                |             | 2020     | #####      | #####         |             | 9663-9673           |          |       | 21     | 10       |
| 6HG8CMV  | journalArti | 2020        | Chen, Cher    | Analysis of Chinese Journal of Ca             |             |      | 0253-3758 | 10.3760/cr                      | http://rs.yi                              | Objective 1 | 3/6/2020 | #####      | #####         | #####       | E008-E008           |          |       | 0      | 48       |
| 63YFU7BC | journalArti | 2020        | Cummings      | Epidemiol Lancet (London, Engl                |             |      | 1474-547X | 10.1016/S0140-6736              | ( BACKGRO                                 |             | 6/6/2020 | #####      | #####         |             | 1763-1770           |          |       | 10239  | 395      |
| 3A783NZY | journalArti | 2020        | Deng, Qing    | Suspected International journal               |             |      | 1874-1754 | 10.1016/j.ijcard.2020           | BACKGRO                                   |             | #####    | #####      | #####         |             | 116-121             |          |       |        | 311      |
| UIYK76XZ | journalArti | 2020        | Gao, Lei; Ji  | Prognostic Respiratory research               |             |      | 1465-993X | 10.1186/s12931-020-             | BACKGRO                                   |             | #####    | #####      | #####         |             | 83                  |          |       | 1      | 21       |
| CPVLJFBH | journalArti | 2020        | Ge, Heng;     | Cardiac Str medRxiv                           |             |      |           | 10.1101/2020.05.12.20095885     | http://me                                 | BACKGRO     | 1/1/2020 | #####      | #####         |             | 2020.05.12.20095885 |          |       |        |          |
| PI8NNFHY | journalArti | 2020        | Gil-Rodrig    | Analysis of Emergencias : revista             |             |      | 2386-5857 | 1137-6821                       | OBJECTIVE                                 |             | 2020     | #####      | #####         |             | 233-241             |          |       | 4      | 32       |
| 7FFMUQP  | journalArti | 2020        | Huang, Ma     | Clinical Ch: The American journal             |             |      | 1538-2990 | 10.1016/j.amjms.2020            | BACKGRO                                   |             | 2020-08  | #####      | #####         |             | 120-128             |          |       | 2      | 360      |
| 5PSB25H3 | journalArti | 2020        | Knight Dar    | Myocardia Circulation                         |             |      |           | 10.1161/Circulation             | https://www.ahajour                       |             | #####    | #####      | #####         | #####       | 1120-1122           |          |       | 11     | 142      |
| 5UVBEYTP | journalArti | 2020        | Li, Yuman;    | The preval Intensive Care Medici              |             |      | 1432-1238 | 10.1007/s10053-020-0100-0       | https://doi.org/10.1007/s10053-020-0100-0 |             | 8/7/2020 | #####      | #####         | #####       |                     |          |       |        |          |
| EJ24K7FH | journalArti | 2020        | liu, youbin   | Clinical fea medRxiv                          |             |      |           | 10.1101/2020.03.31.20047142     | http://me                                 | Aims To ex  | 1/1/2020 | #####      | #####         |             | 2020.03.31.20047142 |          |       |        |          |
| F4NTQP5J | journalArti | 2020        | McCulloug     | Electrocar Journal of cardiac fail            |             |      | 1532-8414 | 10.1016/j.cardfail.2020.07.001  | BACKGRO                                   |             | 2020-07  | #####      | #####         |             | 626-632             |          |       | 7      | 26       |
| CT9JGVK2 | journalArti | 2020        | Nie Shao-F    | Cardiac Tr Circulation                        |             |      |           | 10.1161/Circulation             | https://www.ahajour                       |             | #####    | #####      | #####         | #####       | 608-610             |          |       | 6      | 142      |
| IKKK3BZX | journalArti | 2020        | Pagnesi, M    | Pulmonary Heart (British Cardiac              |             |      | 1468-201X | 10.1136/heartjnl-2020-02-035331 | OBJECTIVE                                 |             | 2020-09  | #####      | #####         |             | 1324-1331           |          |       | 17     | 106      |
| WIJ97WX6 | journalArti | 2020        | Rath, Dom     | Impaired c Clinical Research in C             |             |      | 1861-0692 | 10.1007/s10079-020-0100-0       | https://doi                               | COVID-19 i  | #####    | #####      | #####         | #####       |                     |          |       |        |          |
| SLBSCJPR | journalArti | 2020        | Shi, Shaob    | Characteri European Heart Journ               |             |      | 0195-668X | 10.1093/eurheartj/ehaa001       | AbstractA                                 |             | 6/7/2020 | #####      | #####         | #####       | 2070-2079           |          |       | 22     | 41       |
| DQDZLY8Z | journalArti | 2020        | Szekely Yis   | Spectrum Circulation                          |             |      |           | 10.1161/Circulation             | https://wv                                | Backgrou    | #####    | #####      | #####         | #####       | 342-353             |          |       | 4      | 142      |
| 5VG8C53I | journalArti | 2020        | Xu Huayan     | Clinical Ch: Journal of the American Heart As |             |      |           | 10.1161/JAHA.120.01000          | https://wv                                | Backgrou    | #####    | #####      | #####         | #####       | e016807             |          |       | 18     | 9        |
| BT6NX84R | journalArti | 2020        | Xw, He; Js,   | [Impact of Zhonghua xin xue Gu                |             |      | 0253-3758 | 10.3760/cr                      | https://eui                               | Europe PM   | 6/1/2020 | #####      | #####         | #####       | 456-460             |          |       | 6      | 48       |
| AR5YVHEZ | journalArti | 2020        | Zhang, Jiar   | Myocardia medRxiv                             |             |      |           | 10.1101/2020.05.06.20068882     | https://wv                                | <p>Backgr   | 5/9/2020 | #####      | #####         | #####       | 2020.05.06.20068882 |          |       |        |          |
| Y5YJGW9V | journalArti | 2020        | Zhou, Fei;    | Clinical co The Lancet                        |             |      | 0140-6736 | 10.1016/S0140-6736(20)30863-9   | http://ww                                 | Backgrou    | #####    | #####      | #####         | #####       | 1054-1062           |          |       | 10229  | 395      |
| DPINYNJ9 | journalArti | 2020        | Zou, Xiaoji   | Acute Phys: Critical care medicine            |             |      | 1530-0293 | 10.1097/CCM.0000000000000351    | OBJECTIVE                                 |             | 2020-08  | #####      | #####         |             | e657-e665           |          |       | 8      | 48       |
| TKXXAVQZ | journalArti | 2020        | 汪, 成; 黎, 新型冠状 | 中国体外循环杂志                                      |             |      |           |                                 | 目的研究                                      |             | #####    | #####      | #####         |             |                     |          |       | 3      | 18       |
| C37GY8MC | journalArti | 2020        | 洪, 仲思; 对比分析   | 新型冠状病毒感染及                                     |             |      | 1007-3949 |                                 | 目的回顾                                      |             | #####    | #####      | #####         |             |                     |          |       | 4      | 28       |

| Journal Ab Short Title Series                                                    | Series Nun Series Text Series Title Publisher | Place | Language | Rights                                                              | Type          | Archive | Archive Lo | Library Cat Call Numbr | Extra | Notes                  | File Attach Link Attach Manual Ta                                                                          |
|----------------------------------------------------------------------------------|-----------------------------------------------|-------|----------|---------------------------------------------------------------------|---------------|---------|------------|------------------------|-------|------------------------|------------------------------------------------------------------------------------------------------------|
| Theranostics                                                                     |                                               |       | eng      | © The author(s).                                                    |               |         |            |                        |       | PMID: 32863952         | PM(C:\Users\Louie Floren Aged; Fem                                                                         |
| Lancet                                                                           |                                               |       | ch       | info: Chinese Medical Association and Chine                         | rs.yiigle.com |         |            |                        |       | Number: 00             | Publisher C:\Users\Louie Florendo Dy\Zote                                                                  |
| Int J Cardiol                                                                    |                                               |       | eng      | Copyright © 2020 Elsevier Ltd. All rights reserved.                 |               |         |            |                        |       | PMID: 32442528         | PM(C:\Users\Louie Floren Adult; Agec                                                                       |
| Respir Res                                                                       |                                               |       | eng      | Copyright © 2020 Elsevier B.V. All rights reserved.                 |               |         |            |                        |       | PMID: 32291207         | PM(C:\Users\Louie Floren Adult; Fem                                                                        |
| Emergencias                                                                      |                                               |       | spa      |                                                                     |               |         |            |                        |       | PMID: 32293449         | PM(C:\Users\Louie Floren Adult; Agec<br>C:\Users\Louie Florendo Dy\Zote                                    |
| Am J Med Sci                                                                     |                                               |       | eng      | Copyright © 2020 Southern Society for Clinical Investigation. Publi |               |         |            |                        |       | Place: Spain           | PMID: 32 C:\Users\Louie Floren Adult; Agec                                                                 |
| Circulation                                                                      |                                               |       |          |                                                                     |               |         |            |                        |       | Place: United States P | C:\Users\Louie Floren Adult; Agec                                                                          |
| Intensive Care Med                                                               |                                               |       | en       |                                                                     |               |         |            |                        |       | ahajournals.org (Atyp  | Publisher: American F C:\Users\Louie Florendo Dy\Zote                                                      |
| J Card Fail                                                                      |                                               |       | eng      | Copyright © 2020 Elsevier Inc. All rights reserved.                 |               |         |            |                        |       | Springer Link          | C:\Users\Louie Florendo Dy\Zote<br>C:\Users\Louie Florendo Dy\Zote                                         |
| Circulation                                                                      |                                               |       |          |                                                                     |               |         |            |                        |       | PMID: 32544622         | PM(C:\Users\Louie Floren Aged; Agec                                                                        |
| Heart                                                                            |                                               |       | eng      | © Author(s) (or their employer(s)) 2020. No commercial re-use. Se   |               |         |            |                        |       | ahajournals.org (Atyp  | Publisher: American F C:\Users\Louie Florendo Dy\Zote                                                      |
| Clin Res Cardiol                                                                 |                                               |       | en       |                                                                     |               |         |            |                        |       | Place: England         | PMID: C:\Users\Louie Floren Female; HU<br>C:\Users\Louie Florendo Dy\Zote                                  |
| Eur Heart J                                                                      |                                               |       | en       |                                                                     |               |         |            |                        |       | academic.oup.com       | Publisher: Oxford Aca C:\Users\Louie Florendo Dy\Zote                                                      |
| Circulation                                                                      |                                               |       |          |                                                                     |               |         |            |                        |       | ahajournals.org (Atyp  | Publisher: American F C:\Users\Louie Florendo Dy\Zote                                                      |
| Journal of the American Heart Association                                        |                                               |       |          |                                                                     |               |         |            |                        |       | ahajournals.org (Atyp  | Publisher: American F C:\Users\Louie Florendo Dy\Zote                                                      |
| Zhonghua Xin Xue Guan Bing Za Zhi                                                |                                               |       | English  |                                                                     |               |         |            |                        |       | europemc.org           | PMID: 32171190<br>C:\Users\Louie Florendo Dy\Zote                                                          |
| The Lancet                                                                       |                                               |       | en       | © 2020, Posted by Cold Spring Harbor Labo                           |               |         |            |                        |       | www.medrxiv.org        | Publisher: Cold Spring C:\Users\Louie Florendo Dy\Zote                                                     |
| Clinical course and risk factors for mortality of adult inpatients with COVID-19 |                                               |       | en       |                                                                     |               |         |            |                        |       | ScienceDirect          | C:\Users\Louie Florendo Dy\Zote                                                                            |
| Crit Care Med                                                                    |                                               |       | eng      |                                                                     |               |         |            |                        |       | PMID: 32697506         | PM(C:\Users\Louie Floren Adult; Agec<br>C:\Users\Louie Florendo Dy\Zote<br>C:\Users\Louie Florendo Dy\Zote |

Automatic Editor Series Edit Translator Contributor Attorney A Book Author Cast Member Commenter Composer Cosponsor Counsel Interviewer Producer Recipient Reviewed /Scriptwriter Words By Guest Number  
ale; Humans; Male; Middle Aged; Pandemics; Retrospective Studies; Prognosis; China; Cohort Studies; Predictive Value of Tests; \*COVID-19; Hospitalization; Troponin I/\*blood; \*in-hospital fatality; \*myocardial injury; \*Tro  
ro\storage\VS467UVL\Chen et al. - 2020 - Analysis of myocardial injury in patients with COV.pdf  
d; Aged, 80 and over; Female; Humans; Male; Middle Aged; Pandemics; Young Adult; Age Factors; Betacoronavirus; Fibrin Fibrinogen Degradation Products/analysis; Risk Factors; Prospective Studies; Biomarkers/blood; Res  
ale; Humans; Male; Middle Aged; Pandemics; Retrospective Studies; Treatment Outcome; Comorbidity; Prognosis; China; Cohort Studies; Biomarkers/blood; Risk Assessment; \*COVID-19; Severity of Illness Index; Survival A  
d; Female; Humans; Male; Middle Aged; Retrospective Studies; Prognosis; Betacoronavirus; Clinical Laboratory Techniques; Risk Factors; COVID-19; SARS-CoV-2; \*Pandemics; \*Hospital Mortality; Predictive Value of Tests; N  
ro\storage\4NHDV8E2\Ge et al. - 2020 - Cardiac Structural and Functional Characteristics .pdf  
d; Aged, 80 and over; Female; Humans; Male; Middle Aged; Pandemics; Respiration, Artificial/statistics & numerical data; Comorbidity; Prognosis; Young Adult; Adolescent; Age Factors; \*Betacoronavirus; Age Distribution; C  
d; Aged, 80 and over; Female; Humans; Male; Middle Aged; Retrospective Studies; China; \*Betacoronavirus; \*Pandemics; \*COVID-19; \*Coronavirus Infections/blood/mortality/therapy; \*Pneumonia, Viral/blood/mortality/tl  
ro\storage\7ZQYYANK\Knight Daniel S. et al. - 2020 - Covid-19.pdf  
ro\storage\QVUXS434\Li et al. - 2020 - The prevalence, risk factors and outcome of cardia.pdf  
ro\storage\26U694TJ\liu et al. - 2020 - Clinical features and outcomes of 2019 novel coron.pdf  
d, 80 and over; Female; Humans; Male; Middle Aged; Pandemics; Retrospective Studies; Cohort Studies; \*Betacoronavirus; \*mortality; \*COVID-19; \*myocardial injury; Hospital Mortality/trends; \*electrocardiography; Bundl  
ro\storage\TLYPIHN5\Nie Shao-Fang et al. - 2020 - Cardiac Troponin I Is an Independent Predictor for.pdf; C:\Users\Louie Florendo Dy\Zotero\storage\5FTQPRRW\CIRCULATIONAHA.120.html  
umans; Male; Middle Aged; Comorbidity; \*Pandemics; Hospitalization/statistics & numerical data; Severity of Illness Index; Italy/epidemiology; Prevalence; Correlation of Data; Betacoronavirus/\*isolation & purification; Out  
ro\storage\J47JAY4S\Rath et al. - 2020 - Impaired cardiac function is associated with morta.pdf  
ro\storage\YWVEMSPU\Shi et al. - 2020 - Characteristics and clinical significance of myoca.pdf; C:\Users\Louie Florendo Dy\Zotero\storage\TSLN85R9\5835730.html  
ro\storage\SPLXV6JA\Szekely Yishay et al. - 2020 - Spectrum of Cardiac Manifestations in COVID-19.pdf; C:\Users\Louie Florendo Dy\Zotero\storage\5LL5QI2K\CIRCULATIONAHA.120.html  
ro\storage\XGFQ7DM5\Xu Huayan et al. - 2020 - Clinical Characteristics and Risk Factors of Cardi.pdf; C:\Users\Louie Florendo Dy\Zotero\storage\KUG9FSJT\JAHA.120.html  
ro\storage\K99UIZKA\Xw et al. - 2020 - [Impact of complicated myocardial injury on the cl.pdf  
ro\storage\Y4IQJL2F\Zhang et al. - 2020 - Myocardial characteristics as the prognosis for CO.pdf; C:\Users\Louie Florendo Dy\Zotero\storage\WRSXSH83\2020.05.06.html  
ro\storage\YTXS5TKH\S0140673620305663.html; C:\Users\Louie Florendo Dy\Zotero\storage\3FUF8MJ6\Zhou et al. - 2020 - Clinical course and risk factors for mortality of .pdf  
d; China/epidemiology; Female; Humans; Intensive Care Units/statistics & numerical data; Male; Middle Aged; Pandemics; Retrospective Studies; \*Hospital Mortality; Predictive Value of Tests; Hospitalization/statistics & nu  
ro\storage\AYQD95BZ\汪 et al. - 2020 - 新型冠状病毒肺炎患者心肌损伤的临床分析.pdf  
ro\storage\SBZI43B6\洪 et al. - 2020 - 对比分析 18 例重症 危重症新型冠状病毒肺炎心肌损伤患者临床特征.pdf

Edition Running Title Scale Medium Artwork Size Filing Date Application Assignee Issuing Authority Country Meeting Name Conference Court Reference Reporter Legal Status Priority Number Program Version System

Coronavirus Infections/blood/\*etiology; Coronavirus Infections/blood/\*complications/mortality; Pneumonia, Viral/blood/\*complications/mortality

Respiration, Artificial; Hospitalization; Hospital Mortality; Respiratory Distress Syndrome, Adult/virology; Proportional Hazards Models; New York City/epidemiology; Critical Illness/epidemiology; Interleukin-6/blood; Coronavirus Infections/diagnosis/\*statistics & numerical data; \*Cause of Death; \*Cardiac marker; \*Myocardial injury; \*Myocarditis; \*Novel coronavirus; Coronary Angiography/methods; Coronavirus Infections/\*diagnosis/\*epidemic mortality; \*Coronavirus Infections/diagnosis/mortality; \*Pneumonia, Viral/diagnosis/mortality; Natriuretic Peptide, Brain/\*analysis; NT-proBNT; Outcome; Peptide Fragments/\*analysis; Reference Values

Cardiovascular Diseases/epidemiology; Prospective Studies; \*SARS-CoV-2; \*COVID-19; Hospital Mortality; Sex Distribution; Logistic Models; Odds Ratio; \*Comorbidity; Child; Child, Preschool; Infant; Infant, Newborn; Spain/therapy; \*Critical care; \*Disease progression; \*Respiratory Distress Syndrome, Adult/blood/mortality/therapy; \*Severe patients

Coronary Artery Disease/diagnosis/\*mortality/physiopathology; Coronavirus Infections/diagnosis/\*mortality/physiopathology; Electrocardiography/methods/\*mortality; Heart Failure/diagnosis/\*mortality/physiopathology; Pneumonia, Viral/diagnosis/\*mortality/physiopathology; Outcome Assessment, Health Care; \*Coronavirus Infections/complications/diagnosis/epidemiology/physiopathology; \*echocardiography; \*Hypertension, Pulmonary/diagnosis/epidemiology/etiology; \*Pneumonia, Viral/complications/diagnosis/epidemiology/physiopathology

numerical data; Logistic Models; Proportional Hazards Models; \*Cause of Death; ROC Curve; Causality; Coronavirus Infections/\*diagnosis/\*epidemiology/therapy; Pneumonia, Viral/\*diagnosis/\*epidemiology/therapy; Organ

Code      Code Num Section      Session      Committee History      Legislative Body

rus Infections/\*epidemiology/mortality/\*therapy; Pneumonia, Viral/\*epidemiology/mortality/\*therapy  
ology; Echocardiography, Doppler/methods; Hospitals, University; Myocardial Infarction/diagnosis/\*epidemiology/therapy; Myocarditis/diagnosis/\*epidemiology/therapy; Pneumonia, Viral/\*diagnosis/\*epidemiology  
epidemiology; Emergency Service, Hospital/\*statistics & numerical data; \*Características clínicas; \*Clinical characteristics; \*Comorbilidades; \*Coronavirus disease 2019 (COVID-19); \*Emergency health services; \*Servicios de

onia, Viral/diagnosis/\*mortality/physiopathology

lications/diagnosis/epidemiology/physiopathology; \*pulmonary vascular disease; \*Ventricular Dysfunction, Right/diagnosis/epidemiology/etiology; Echocardiography/methods

Dysfunction Scores; Hospitals, Urban; APACHE; Severe Acute Respiratory Syndrome/diagnosis/\*mortality/therapy; Survivors/statistics & numerical data

urgencias; \*Severe acute respiratory syndrome coronavirus 2 (SARS-CoV-2); \*Symptom Assessment; Coronavirus Infections/\*diagnosis/\*epidemiology/mortality/therapy; Intubation, Intratracheal/statistics & numerical da

ita; Neoplasms/epidemiology; Obesity/complications; Pneumonia, Viral/\*diagnosis/\*epidemiology/mortality/therapy; Respiration Disorders/epide
