# Supplementary material for: Prevalence and prognostic associations of cardiac abnormalities among hospitalized patients with COVID-19: a systematic review and meta-analysis
Source: PubMed Central journal article supplement (PMC8055982; doi:10.1038/s41598-021-87961-x), 2021-04-19
Supplement: 41598_2021_87961_MOESM4_ESM.pdf [file 41598_2021_87961_MOESM4_ESM.pdf]

# **Prevalence and Prognostic Associations of Cardiac Abnormalities Among Hospitalized Patients with COVID-19 – A Systematic Review and Meta-Analysis**

Louie F. Dy<sup>1,4\*</sup>, Ryan C.V. Lintao<sup>1</sup>, Cynthia P. Cordero<sup>2</sup>, Ian Theodore G. Cabaluna<sup>3</sup> and Leonila F. Dans<sup>2,3</sup>

<sup>1</sup>College of Medicine, University of the Philippines Manila, Manila 1000 Philippines

<sup>2</sup>Department of Clinical Epidemiology, College of Medicine, University of the Philippines Manila, Manila 1000 Philippines

<sup>3</sup>Asia Pacific Center for Evidence-Based Healthcare, Manila 1000 Philippines

<sup>4</sup>University of the Philippines COVID-19 Pandemic Response Team, University of the Philippines Resilience Institute, Manila, Philippines

\*Corresponding author, E-mail: [lfdy@up.edu.ph](mailto:lfdy@up.edu.ph)

SM3\_Sensitivity-Analysis.pptx

# Sensitivity Analysis

# Analyses Performed: Briefer

- Outlier Remover
  - An automatic function that removes outliers
- Leave-One-Out Analysis
  - Remove one study and see its effect on heterogeneity
- Influence Diagnostics
  - Several metrics

Pooled OR

# Pooled OR of All Studies

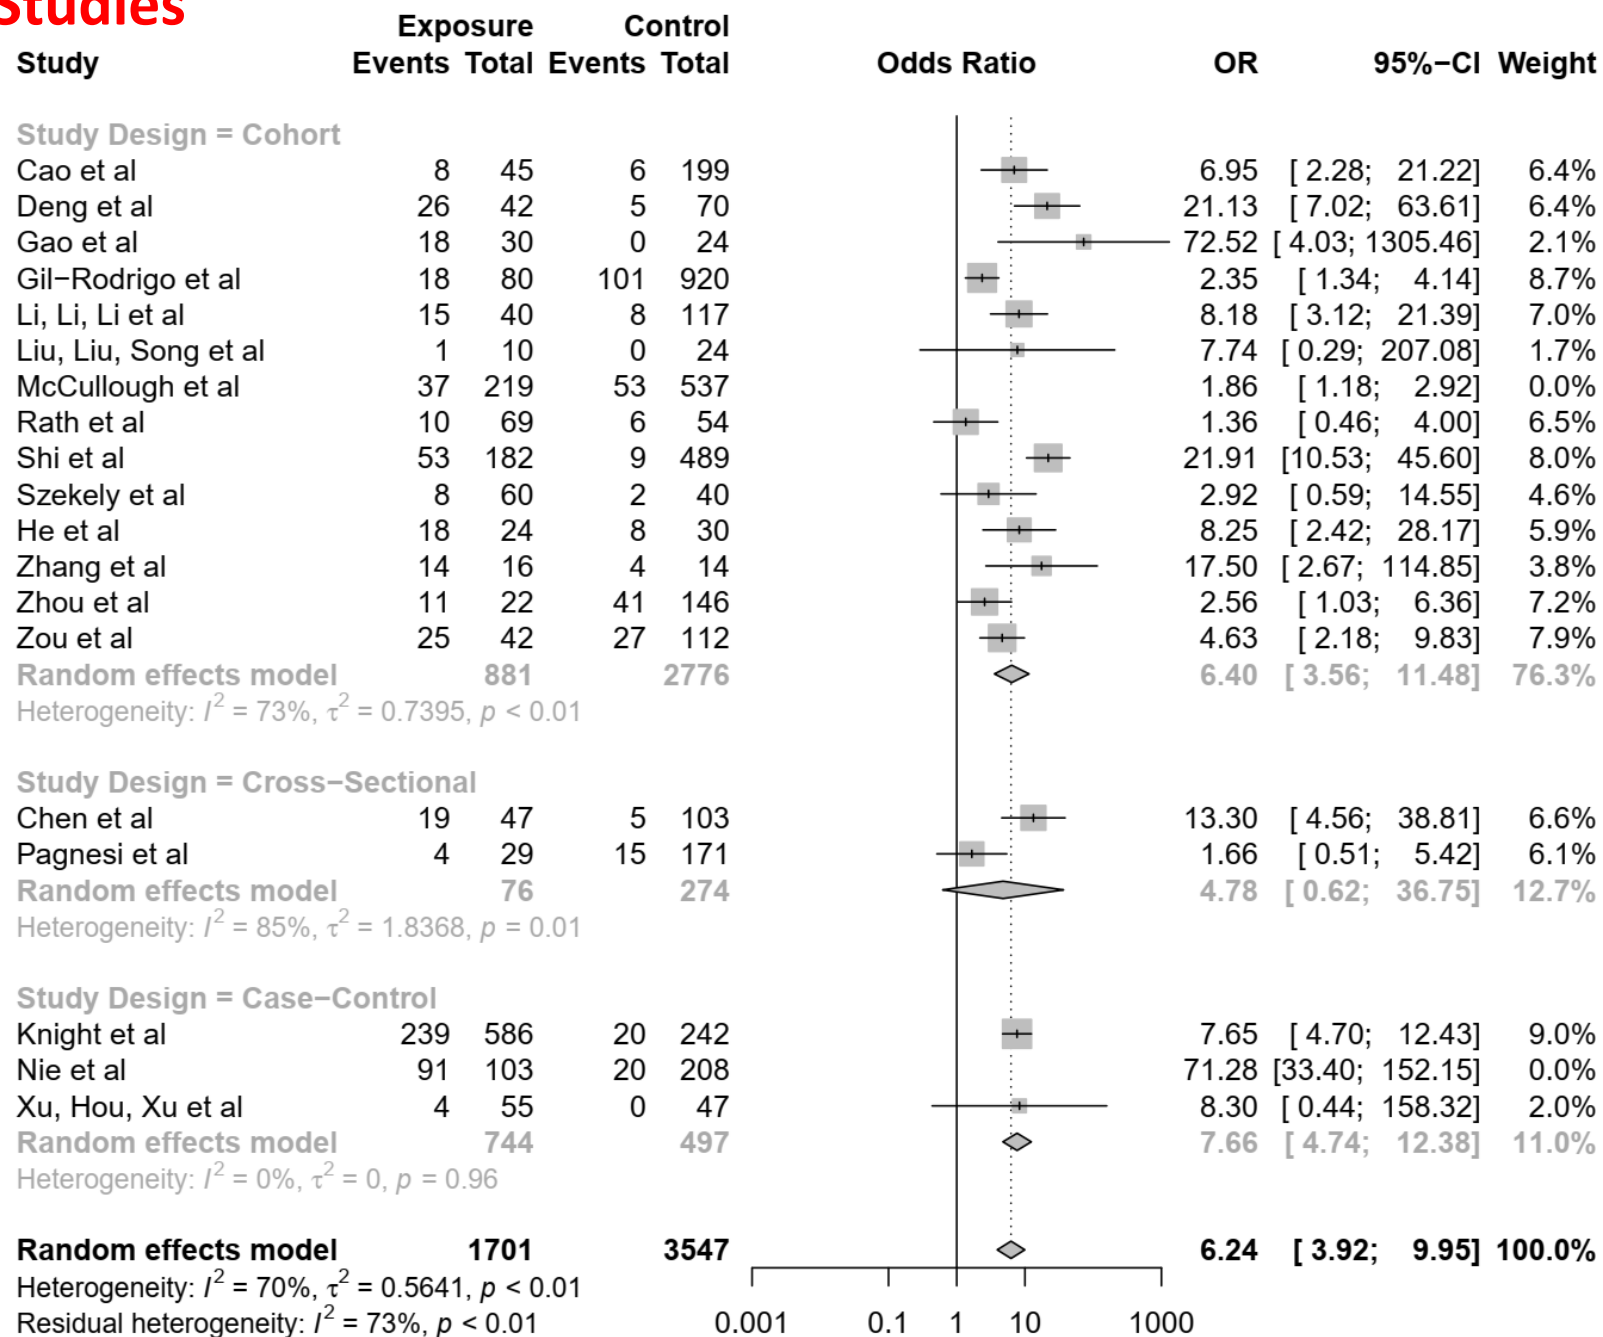

Identified outliers (random-effects model)

-----

"McCullough et al", "Nie et al"

Results with outliers removed

-----

|                      | OR      | 95%-CI               | %W (random) | Study Design    | exclude |
|----------------------|---------|----------------------|-------------|-----------------|---------|
| Cao et al            | 6.9550  | [ 2.2797; 21.2184]   | 6.4         | Cohort          |         |
| Deng et al           | 21.1250 | [ 7.0152; 63.6139]   | 6.4         | Cohort          |         |
| Gao et al            | 72.5200 | [ 4.0286; 1305.4562] | 2.1         | Cohort          |         |
| Gil-Rodrigo et al    | 2.3542  | [ 1.3394; 4.1380]    | 8.7         | Cohort          |         |
| Li, Li, Li et al     | 8.1750  | [ 3.1243; 21.3904]   | 7.0         | Cohort          |         |
| Liu, Liu, Song et al | 7.7368  | [ 0.2891; 207.0783]  | 1.7         | Cohort          |         |
| McCullough et al     | 1.8565  | [ 1.1800; 2.9208]    | 0.0         | Cohort          | *       |
| Rath et al           | 1.3559  | [ 0.4598; 3.9986]    | 6.5         | Cohort          |         |
| Shi et al            | 21.9121 | [10.5295; 45.5999]   | 8.0         | Cohort          |         |
| Szekely et al        | 2.9231  | [ 0.5872; 14.5500]   | 4.6         | Cohort          |         |
| He et al             | 8.2500  | [ 2.4158; 28.1741]   | 5.9         | Cohort          |         |
| Zhang et al          | 17.5000 | [ 2.6666; 114.8459]  | 3.8         | Cohort          |         |
| Zhou et al           | 2.5610  | [ 1.0305; 6.3645]    | 7.2         | Cohort          |         |
| Zou et al            | 4.6296  | [ 2.1802; 9.8309]    | 7.9         | Cohort          |         |
| Chen et al           | 13.3000 | [ 4.5578; 38.8102]   | 6.6         | Cross-Sectional |         |
| Pagnesi et al        | 1.6640  | [ 0.5108; 5.4207]    | 6.1         | Cross-Sectional |         |
| Knight et al         | 7.6452  | [ 4.7009; 12.4338]   | 9.0         | Case-Control    |         |
| Nie et al            | 71.2833 | [33.3974; 152.1468]  | 0.0         | Case-Control    | *       |
| Xu, Hou, Xu et al    | 8.3010  | [ 0.4352; 158.3169]  | 2.0         | Case-Control    |         |

Number of studies combined: k = 17

|                      | OR     | 95%-CI           | z    | p-value  |
|----------------------|--------|------------------|------|----------|
| Random effects model | 6.2434 | [3.9177; 9.9498] | 7.70 | < 0.0001 |

Quantifying heterogeneity:

$\tau^2 = 0.5641$ ;  $\tau = 0.7511$ ;  $I^2 = 69.5\%$  [49.9%; 81.5%];  $H = 1.81$  [1.41; 2.32]

Quantifying residual heterogeneity:

$I^2 = 72.5\%$  [54.0%; 83.6%];  $H = 1.91$  [1.47; 2.47]

Test of heterogeneity:

| Q     | d.f. | p-value  |
|-------|------|----------|
| 52.54 | 16   | < 0.0001 |

Results for subgroups (random effects model):

|                                | k  | OR     | 95%-CI            | $\tau^2$ | $\tau$ | Q     | $I^2$ |
|--------------------------------|----|--------|-------------------|----------|--------|-------|-------|
| Study Design = Cohort          | 13 | 6.3957 | [3.5619; 11.4841] | 0.7395   | 0.8599 | 44.43 | 73.0% |
| Study Design = Cross-Sectional | 2  | 4.7777 | [0.6211; 36.7506] | 1.8368   | 1.3553 | 6.55  | 84.7% |
| Study Design = Case-Control    | 2  | 7.6619 | [4.7418; 12.3804] | 0        | 0      | 0.00  | 0.0%  |

Test for subgroup differences (random effects model):

|                | Q    | d.f. | p-value |
|----------------|------|------|---------|
| Between groups | 0.36 | 2    | 0.8346  |

Details on meta-analytical method:

- Mantel-Haenszel method
- DerSimonian-Laird estimator for  $\tau^2$
- Mantel-Haenszel estimator used in calculation of Q and  $\tau^2$  (like RevMan 5)
- Continuity correction of 0.5 in studies with zero cell frequencies

# Influence Analysis of Pooled OR



### Sorted by Effect Size

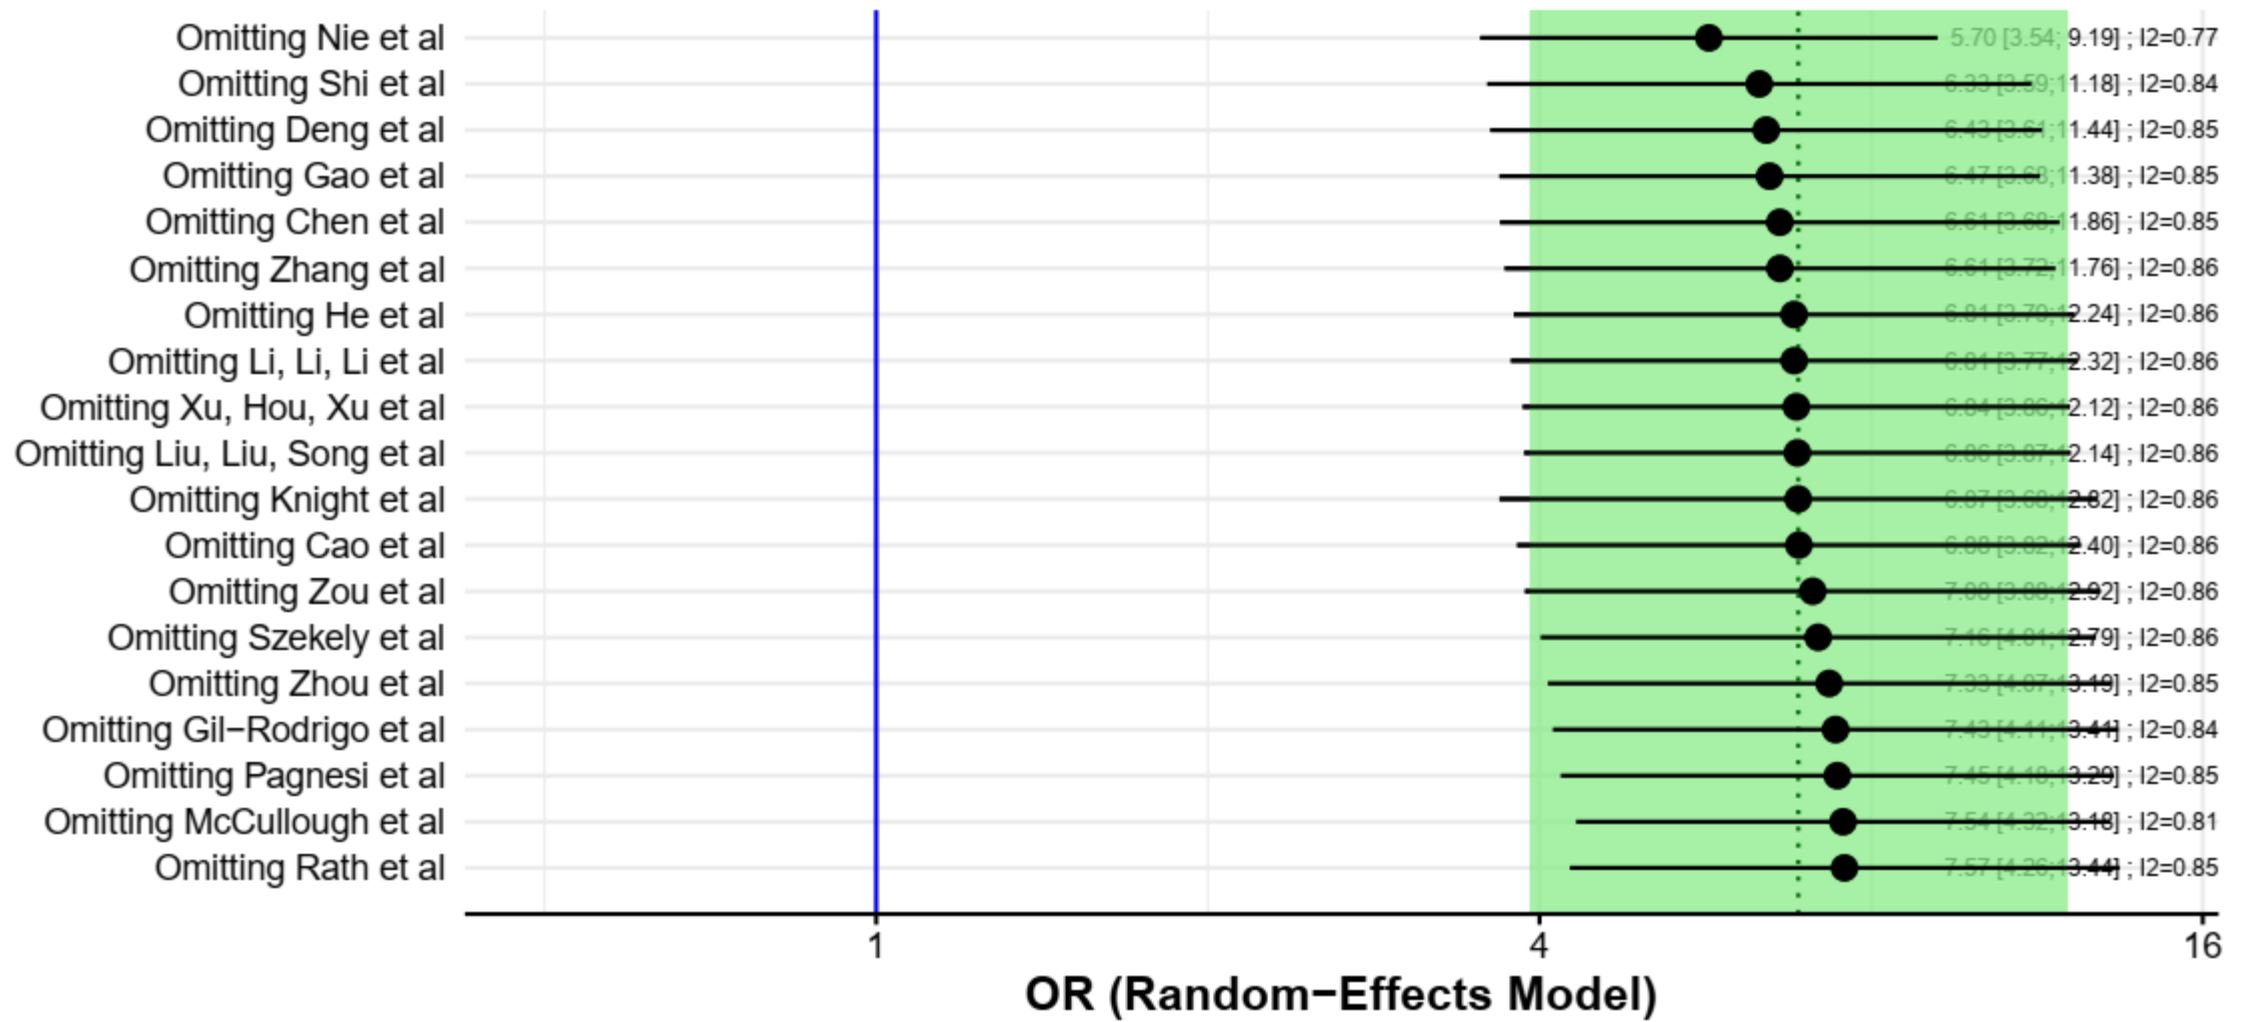

## Sorted by I-squared

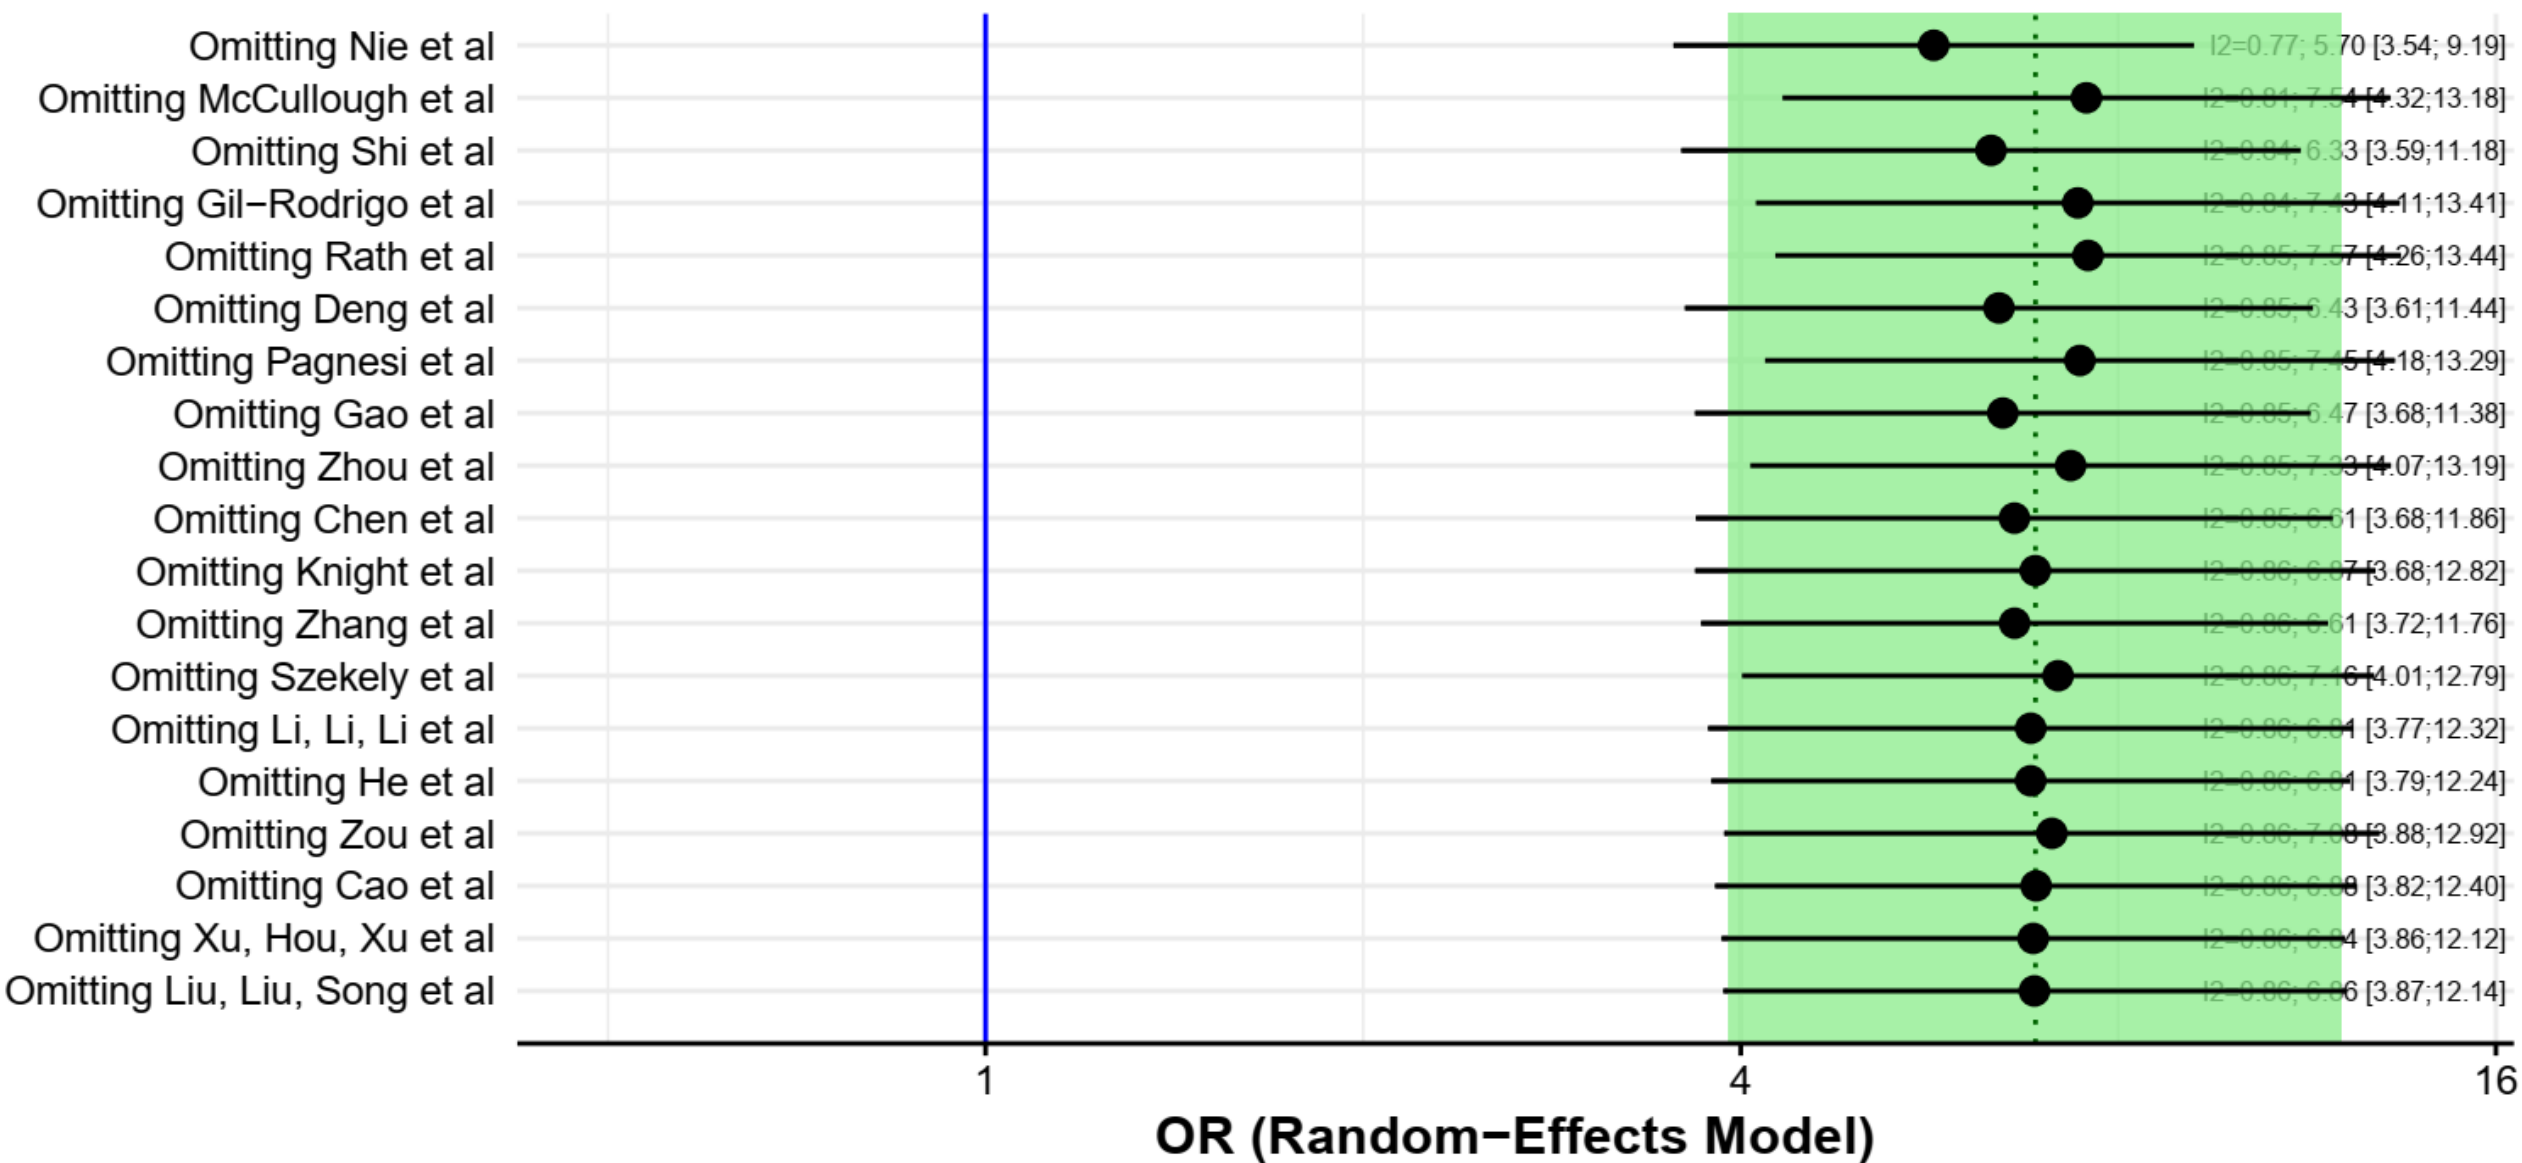

## Leave-One-Out Analysis (Sorted by I2)

|                               | Effect | LLCI  | ULCI   | I2    |
|-------------------------------|--------|-------|--------|-------|
| Omitting Nie et al            | 5.700  | 3.535 | 9.191  | 0.766 |
| Omitting McCullough et al     | 7.545  | 4.319 | 13.180 | 0.813 |
| Omitting Shi et al            | 6.333  | 3.587 | 11.181 | 0.838 |
| Omitting Gil-Rodrigo et al    | 7.427  | 4.114 | 13.408 | 0.843 |
| Omitting Rath et al           | 7.567  | 4.262 | 13.436 | 0.849 |
| Omitting Deng et al           | 6.426  | 3.611 | 11.435 | 0.851 |
| Omitting Pagnesi et al        | 7.455  | 4.183 | 13.288 | 0.852 |
| Omitting Gao et al            | 6.471  | 3.679 | 11.385 | 0.854 |
| Omitting Zhou et al           | 7.329  | 4.072 | 13.194 | 0.854 |
| Omitting Chen et al           | 6.610  | 3.684 | 11.861 | 0.855 |
| Omitting Knight et al         | 6.869  | 3.679 | 12.824 | 0.855 |
| Omitting Zhang et al          | 6.613  | 3.719 | 11.757 | 0.856 |
| Omitting Li, Li, Li et al     | 6.812  | 3.768 | 12.316 | 0.857 |
| Omitting Szekely et al        | 7.162  | 4.010 | 12.793 | 0.857 |
| Omitting He et al             | 6.811  | 3.790 | 12.241 | 0.857 |
| Omitting Zou et al            | 7.081  | 3.880 | 12.922 | 0.857 |
| Omitting Cao et al            | 6.879  | 3.817 | 12.399 | 0.858 |
| Omitting Liu, Liu, Song et al | 6.857  | 3.875 | 12.137 | 0.858 |
| Omitting Xu, Hou, Xu et al    | 6.843  | 3.862 | 12.124 | 0.858 |

# Note how Nie et al (red dot) is an outlier. (Influence Plot)

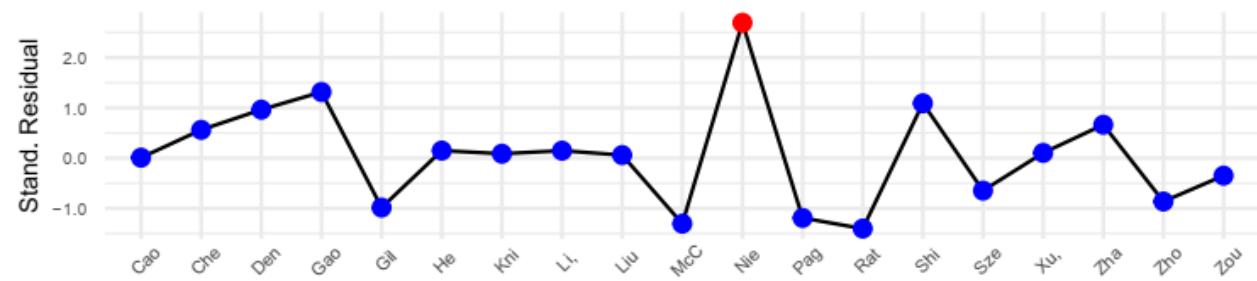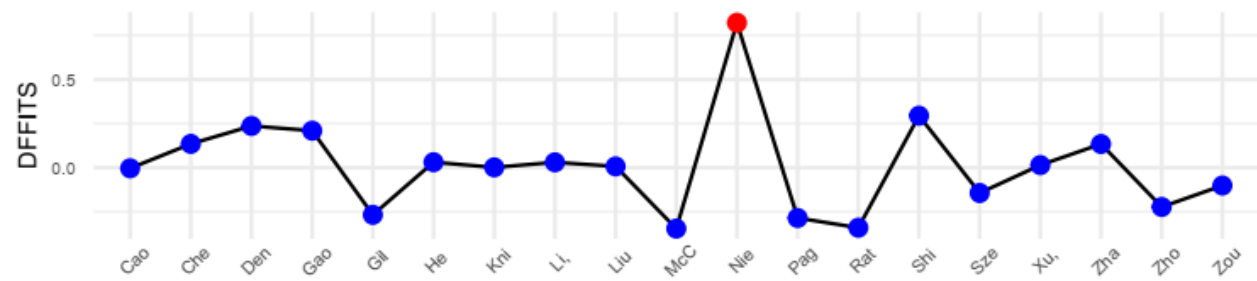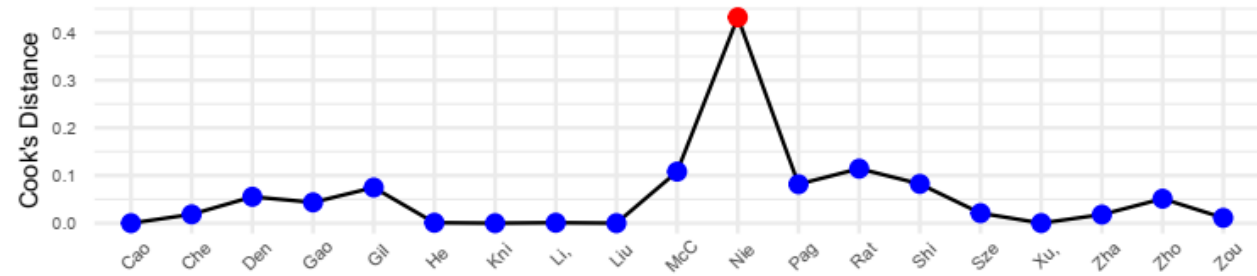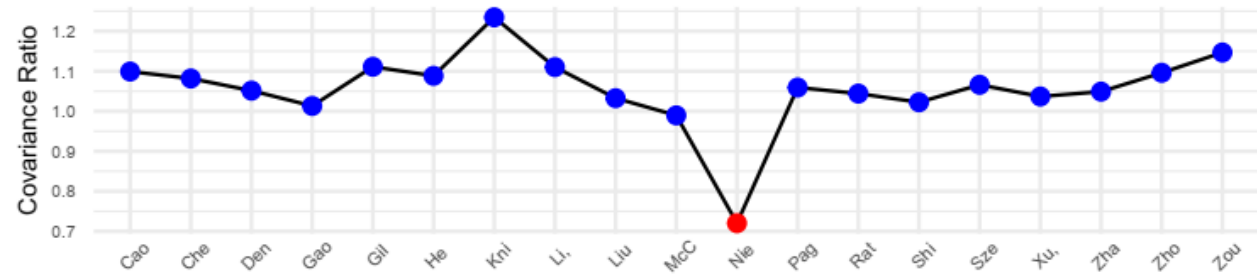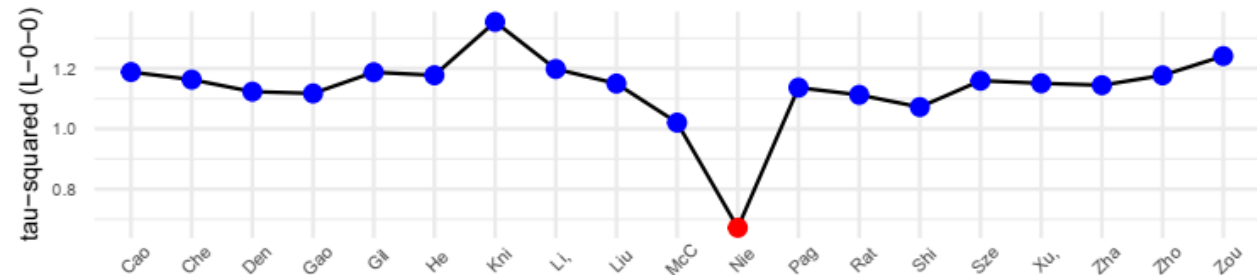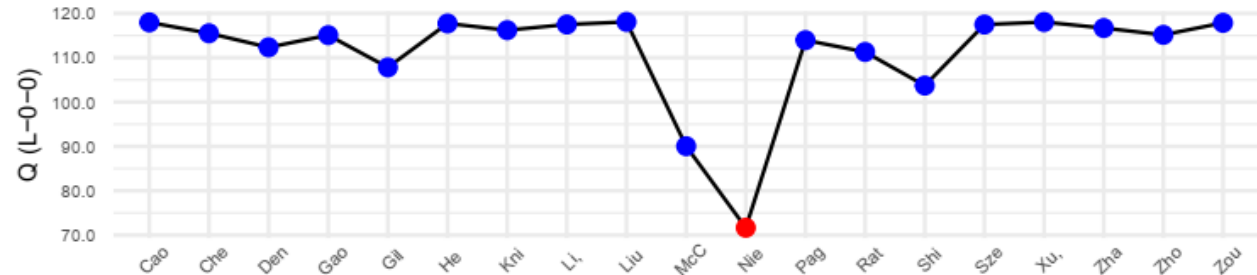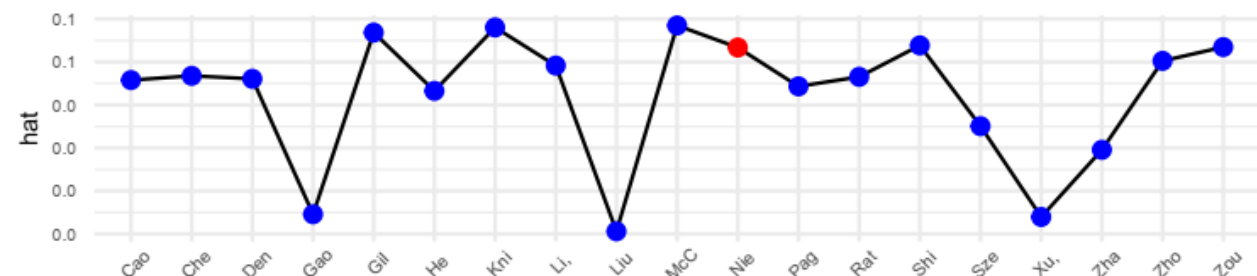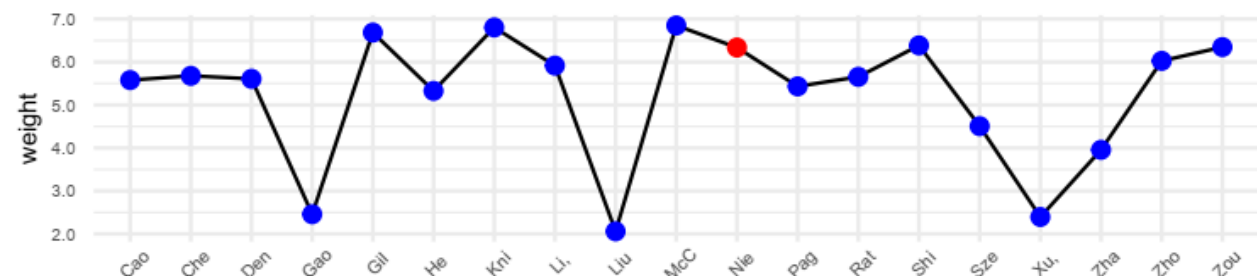

# Influence Diagnostics

|                               | rstudent | dffits | cook.d | cov.r | QE.del  | hat   | weight | infl |
|-------------------------------|----------|--------|--------|-------|---------|-------|--------|------|
| Omitting Cao et al            | 0.009    | -0.004 | 0.000  | 1.099 | 117.958 | 0.056 | 5.579  |      |
| Omitting Deng et al           | 0.964    | 0.236  | 0.055  | 1.051 | 112.339 | 0.056 | 5.608  |      |
| Omitting Gao et al            | 1.316    | 0.209  | 0.044  | 1.013 | 115.076 | 0.025 | 2.458  |      |
| Omitting Gil-Rodrigo et al    | -0.985   | -0.268 | 0.075  | 1.111 | 107.814 | 0.067 | 6.684  |      |
| Omitting Li, Li, Li et al     | 0.148    | 0.030  | 0.001  | 1.110 | 117.485 | 0.059 | 5.916  |      |
| Omitting Liu, Liu, Song et al | 0.060    | 0.007  | 0.000  | 1.033 | 118.073 | 0.021 | 2.061  |      |
| Omitting McCullough et al     | -1.305   | -0.346 | 0.108  | 0.990 | 90.044  | 0.068 | 6.849  |      |
| Omitting Rath et al           | -1.403   | -0.341 | 0.114  | 1.044 | 111.292 | 0.057 | 5.654  |      |
| Omitting Shi et al            | 1.091    | 0.294  | 0.082  | 1.022 | 103.720 | 0.064 | 6.385  |      |
| Omitting Szekely et al        | -0.647   | -0.144 | 0.021  | 1.066 | 117.474 | 0.045 | 4.507  |      |
| Omitting He et al             | 0.149    | 0.031  | 0.001  | 1.088 | 117.715 | 0.053 | 5.327  |      |
| Omitting Zhang et al          | 0.664    | 0.134  | 0.018  | 1.049 | 116.682 | 0.040 | 3.957  |      |
| Omitting Zhou et al           | -0.863   | -0.223 | 0.051  | 1.096 | 115.146 | 0.060 | 6.026  |      |
| Omitting Zou et al            | -0.349   | -0.101 | 0.011  | 1.147 | 117.852 | 0.063 | 6.346  |      |
| Omitting Chen et al           | 0.562    | 0.135  | 0.018  | 1.082 | 115.506 | 0.057 | 5.677  |      |
| Omitting Pagnesi et al        | -1.191   | -0.286 | 0.082  | 1.059 | 113.949 | 0.054 | 5.433  |      |
| Omitting Knight et al         | 0.087    | 0.001  | 0.000  | 1.235 | 116.205 | 0.068 | 6.803  |      |
| Omitting Nie et al            | 2.694    | 0.822  | 0.432  | 0.720 | 71.653  | 0.063 | 6.336  | *    |
| Omitting Xu, Hou, Xu et al    | 0.104    | 0.014  | 0.000  | 1.037 | 118.041 | 0.024 | 2.394  |      |

Note how Nie et al and McCullough et al are outliers. (Baujat Plot)

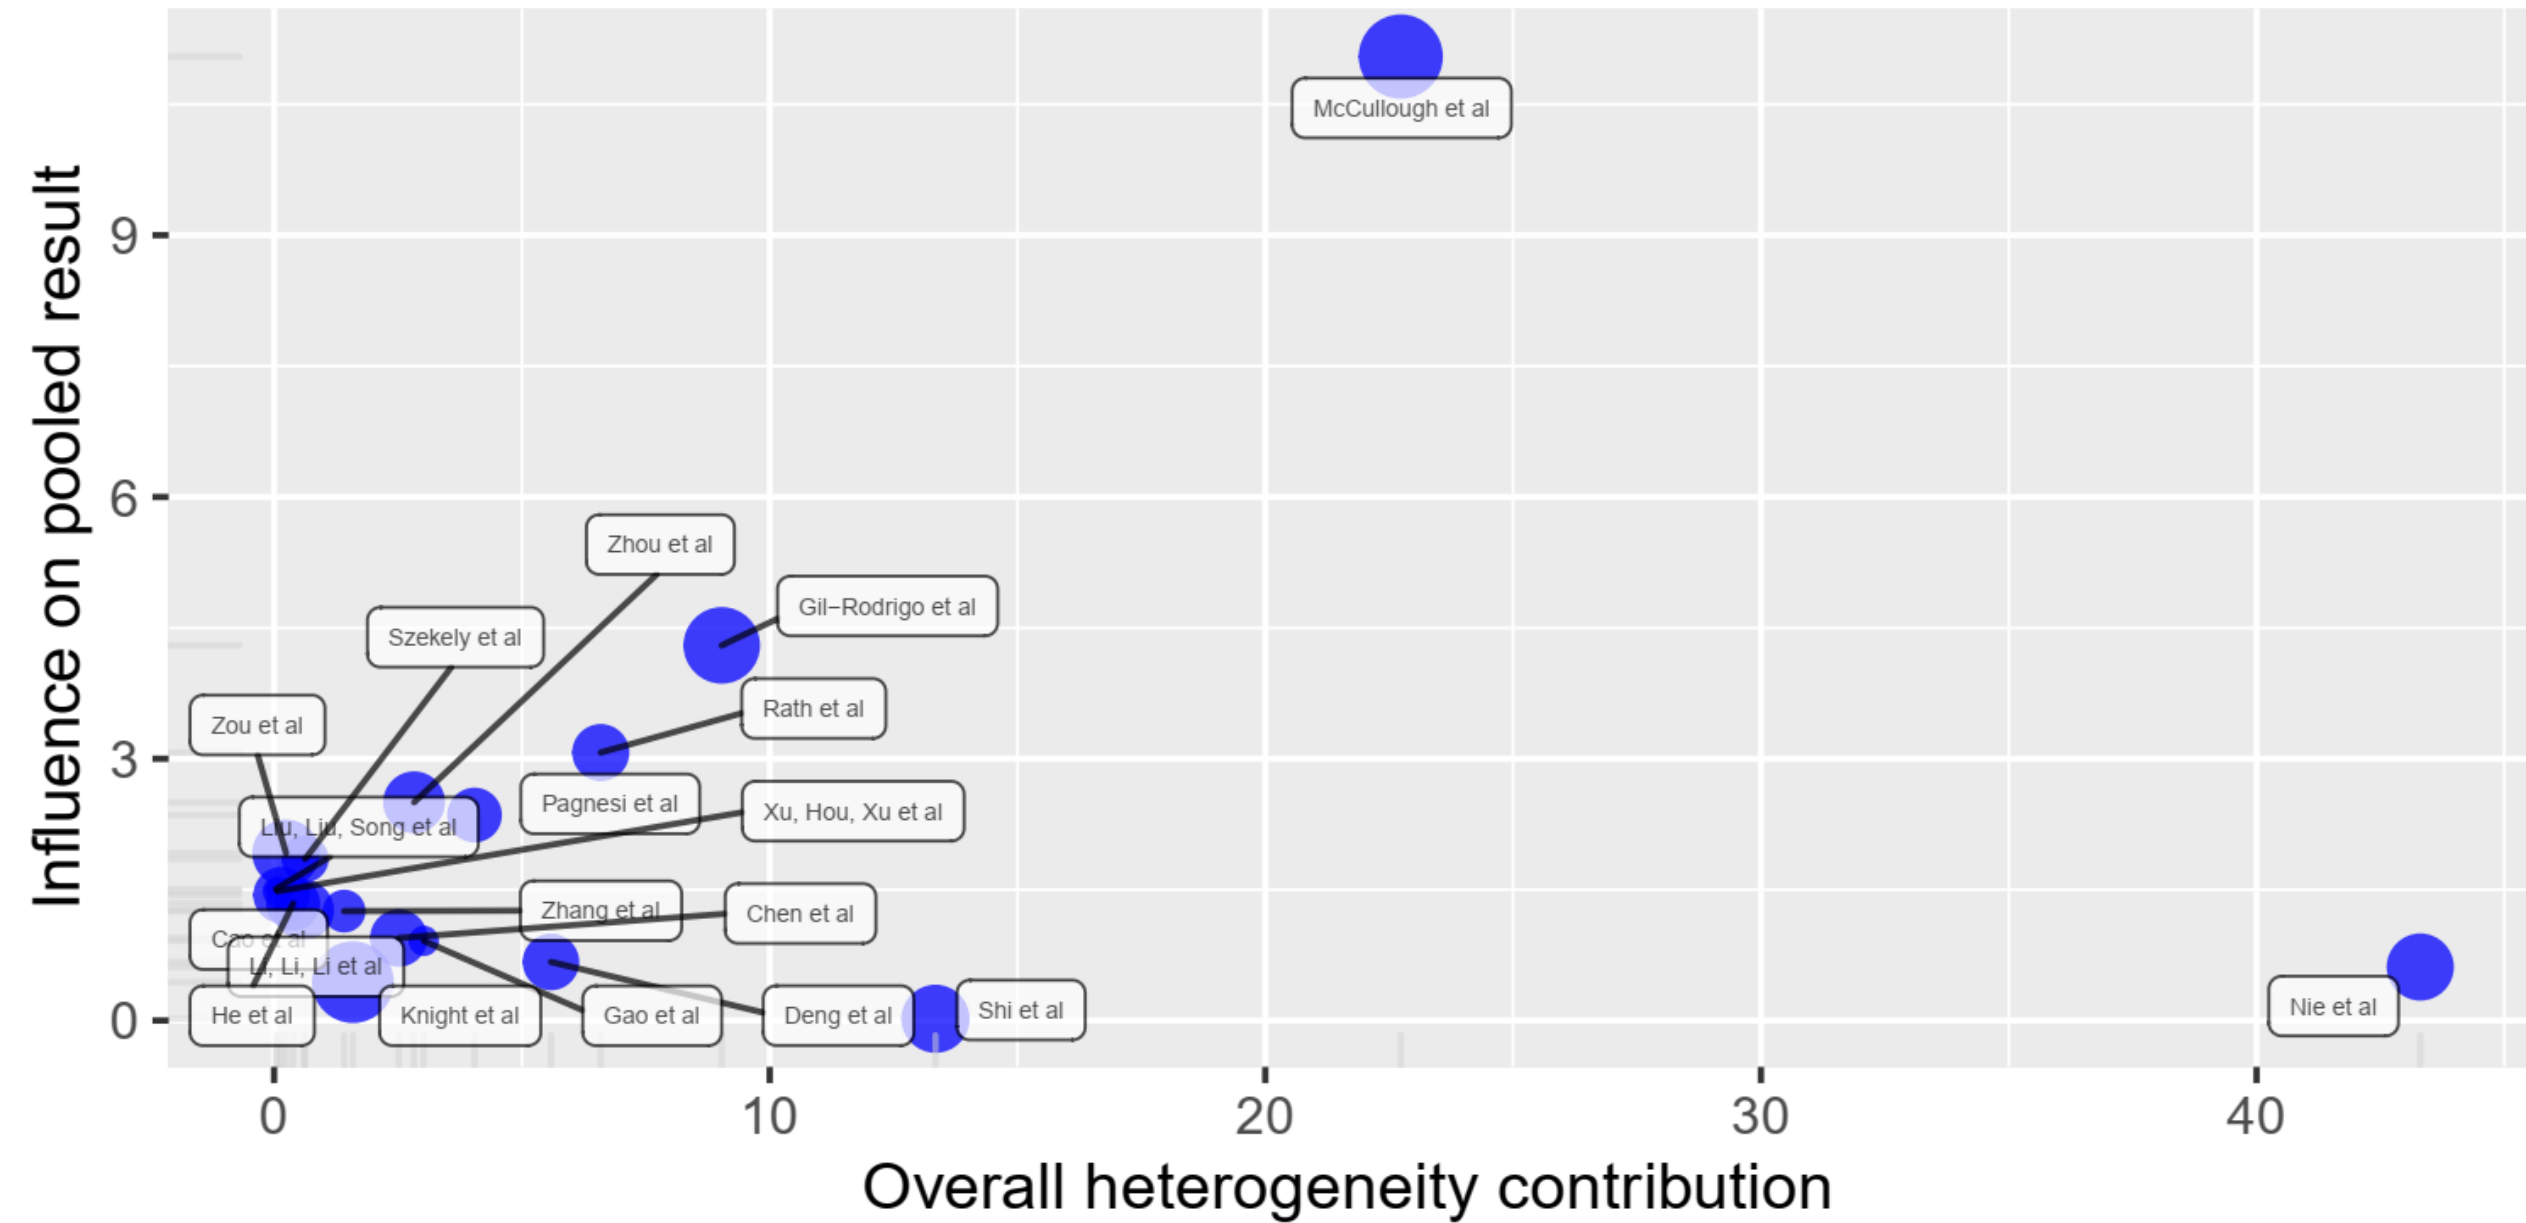

# Baujat Diagnostics (sorted by Heterogeneity Contribution)

---

|                               | HetContrib | Influence | EffectSize |
|-------------------------------|------------|-----------|------------|
| Omitting Nie et al            | 43.304     |           | 0.613      |
| Omitting McCullough et al     | 22.733     |           | 11.047     |
| Omitting Shi et al            | 13.345     |           | 0.020      |
| Omitting Gil-Rodrigo et al    | 9.033      |           | 4.300      |
| Omitting Rath et al           | 6.591      |           | 3.071      |
| Omitting Deng et al           | 5.587      |           | 0.671      |
| Omitting Pagnesi et al        | 4.045      |           | 2.355      |
| Omitting Gao et al            | 3.020      |           | 0.913      |
| Omitting Zhou et al           | 2.825      |           | 2.501      |
| Omitting Chen et al           | 2.516      |           | 0.946      |
| Omitting Knight et al         | 1.591      |           | 0.440      |
| Omitting Zhang et al          | 1.413      |           | 1.254      |
| Omitting Szekely et al        | 0.627      |           | 1.852      |
| Omitting Li, Li, Li et al     | 0.600      |           | 1.266      |
| Omitting He et al             | 0.386      |           | 1.341      |
| Omitting Zou et al            | 0.241      |           | 1.918      |
| Omitting Cao et al            | 0.147      |           | 1.437      |
| Omitting Xu, Hou, Xu et al    | 0.069      |           | 1.481      |
| Omitting Liu, Liu, Song et al | 0.038      |           | 1.509      |

Cohort OR



# Pooled OR of Cohort Studies

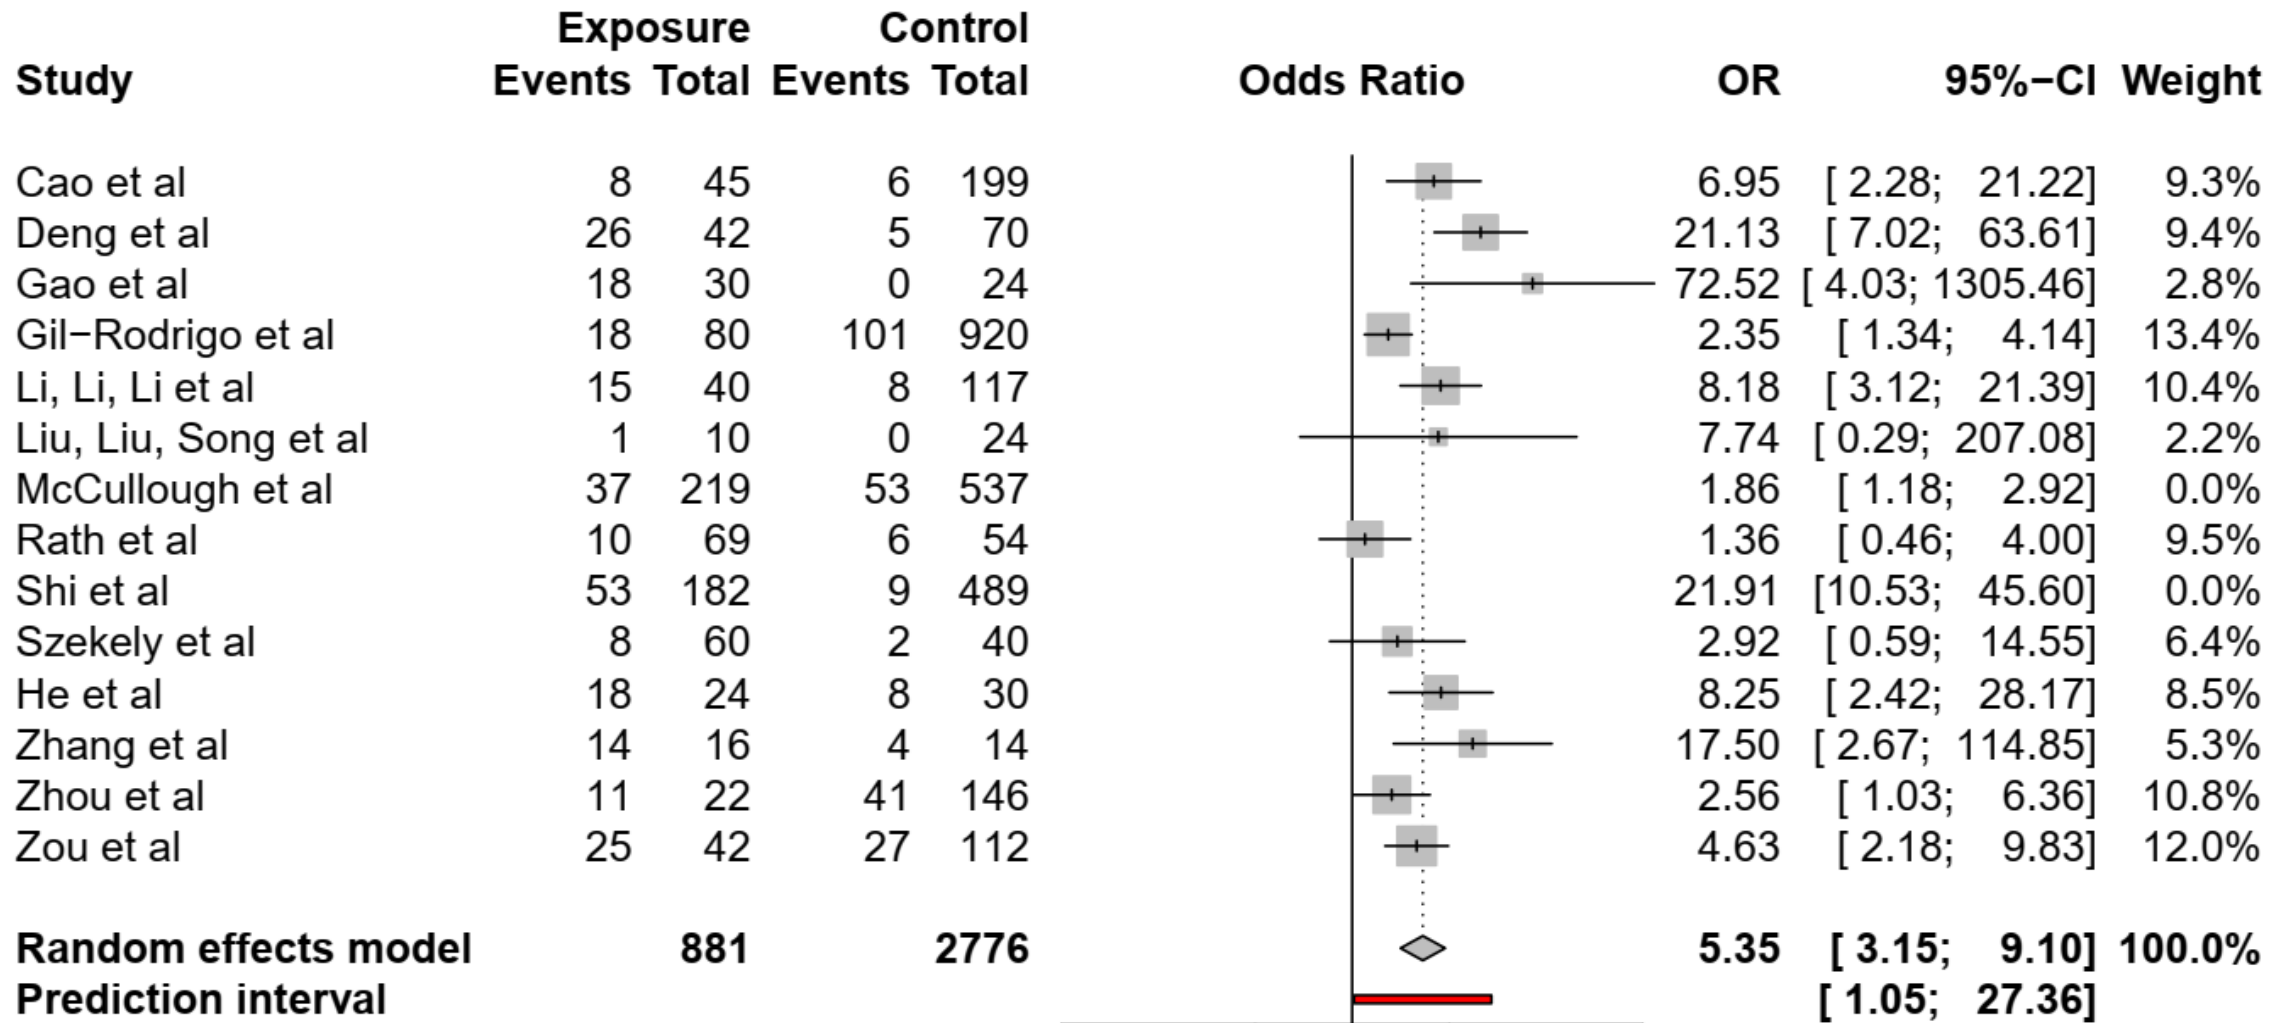

Heterogeneity:  $I^2 = 61\%$ ,  $\tau^2 = 0.4628$ ,  $p < 0.01$

## Identified outliers (random-effects model)

-----

"McCullough et al", "Shi et al"

## Results with outliers removed

-----

|                      | OR      | 95%-CI               | %W (random) | exclude |
|----------------------|---------|----------------------|-------------|---------|
| Cao et al            | 6.9550  | [ 2.2797; 21.2184]   | 9.3         |         |
| Deng et al           | 21.1250 | [ 7.0152; 63.6139]   | 9.4         |         |
| Gao et al            | 72.5200 | [ 4.0286; 1305.4562] | 2.8         |         |
| Gil-Rodrigo et al    | 2.3542  | [ 1.3394; 4.1380]    | 13.4        |         |
| Li, Li, Li et al     | 8.1750  | [ 3.1243; 21.3904]   | 10.4        |         |
| Liu, Liu, Song et al | 7.7368  | [ 0.2891; 207.0783]  | 2.2         |         |
| McCullough et al     | 1.8565  | [ 1.1800; 2.9208]    | 0.0         | *       |
| Rath et al           | 1.3559  | [ 0.4598; 3.9986]    | 9.5         |         |
| Shi et al            | 21.9121 | [10.5295; 45.5999]   | 0.0         | *       |
| Szekely et al        | 2.9231  | [ 0.5872; 14.5500]   | 6.4         |         |
| He et al             | 8.2500  | [ 2.4158; 28.1741]   | 8.5         |         |
| Zhang et al          | 17.5000 | [ 2.6666; 114.8459]  | 5.3         |         |
| Zhou et al           | 2.5610  | [ 1.0305; 6.3645]    | 10.8        |         |
| Zou et al            | 4.6296  | [ 2.1802; 9.8309]    | 12.0        |         |

Number of studies combined: k = 12

|                      | OR     | 95%-CI            | z    | p-value  |
|----------------------|--------|-------------------|------|----------|
| Random effects model | 5.3549 | [3.1523; 9.0965]  | 6.21 | < 0.0001 |
| Prediction interval  |        | [1.0480; 27.3614] |      |          |

#### Quantifying heterogeneity:

$\tau^2 = 0.4628$ ;  $\tau = 0.6803$ ;  $I^2 = 60.8\%$  [26.3%; 79.1%];  $H = 1.60$  [1.16; 2.19]

#### Test of heterogeneity:

| Q     | d.f. | p-value |
|-------|------|---------|
| 28.04 | 11   | 0.0032  |

#### Details on meta-analytical method:

- Mantel-Haenszel method
- DerSimonian-Laird estimator for  $\tau^2$
- Mantel-Haenszel estimator used in calculation of Q and  $\tau^2$  (like RevMan 5)
- Continuity correction of 0.5 in studies with zero cell frequencies

# Influence Analysis of Cohort RR

## Sorted by Effect Size

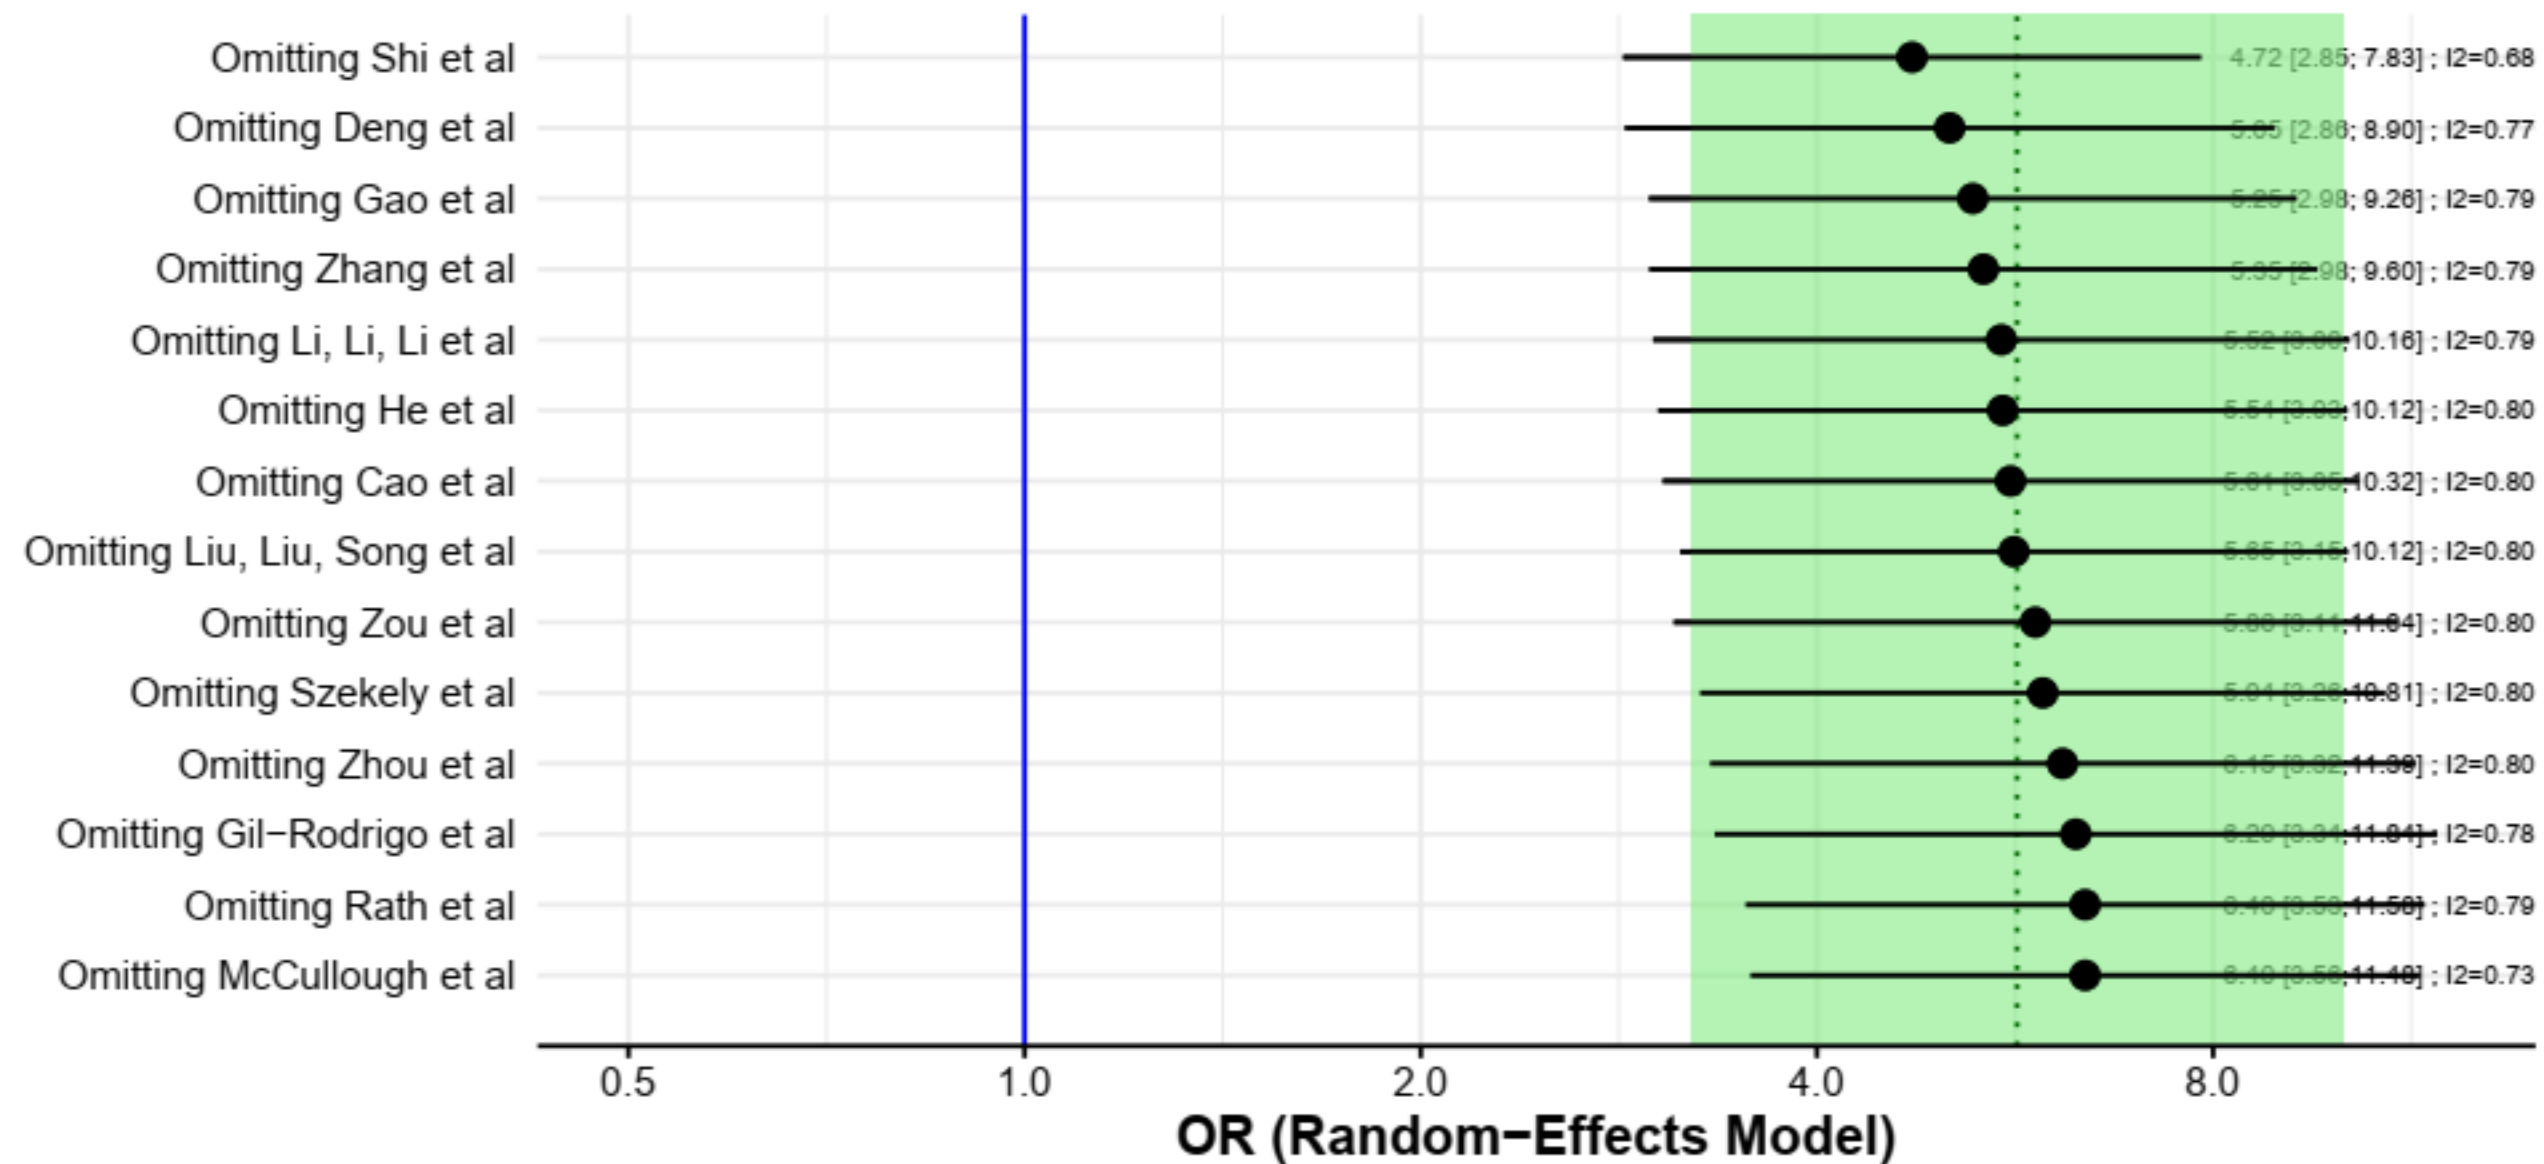

## Sorted by I-squared

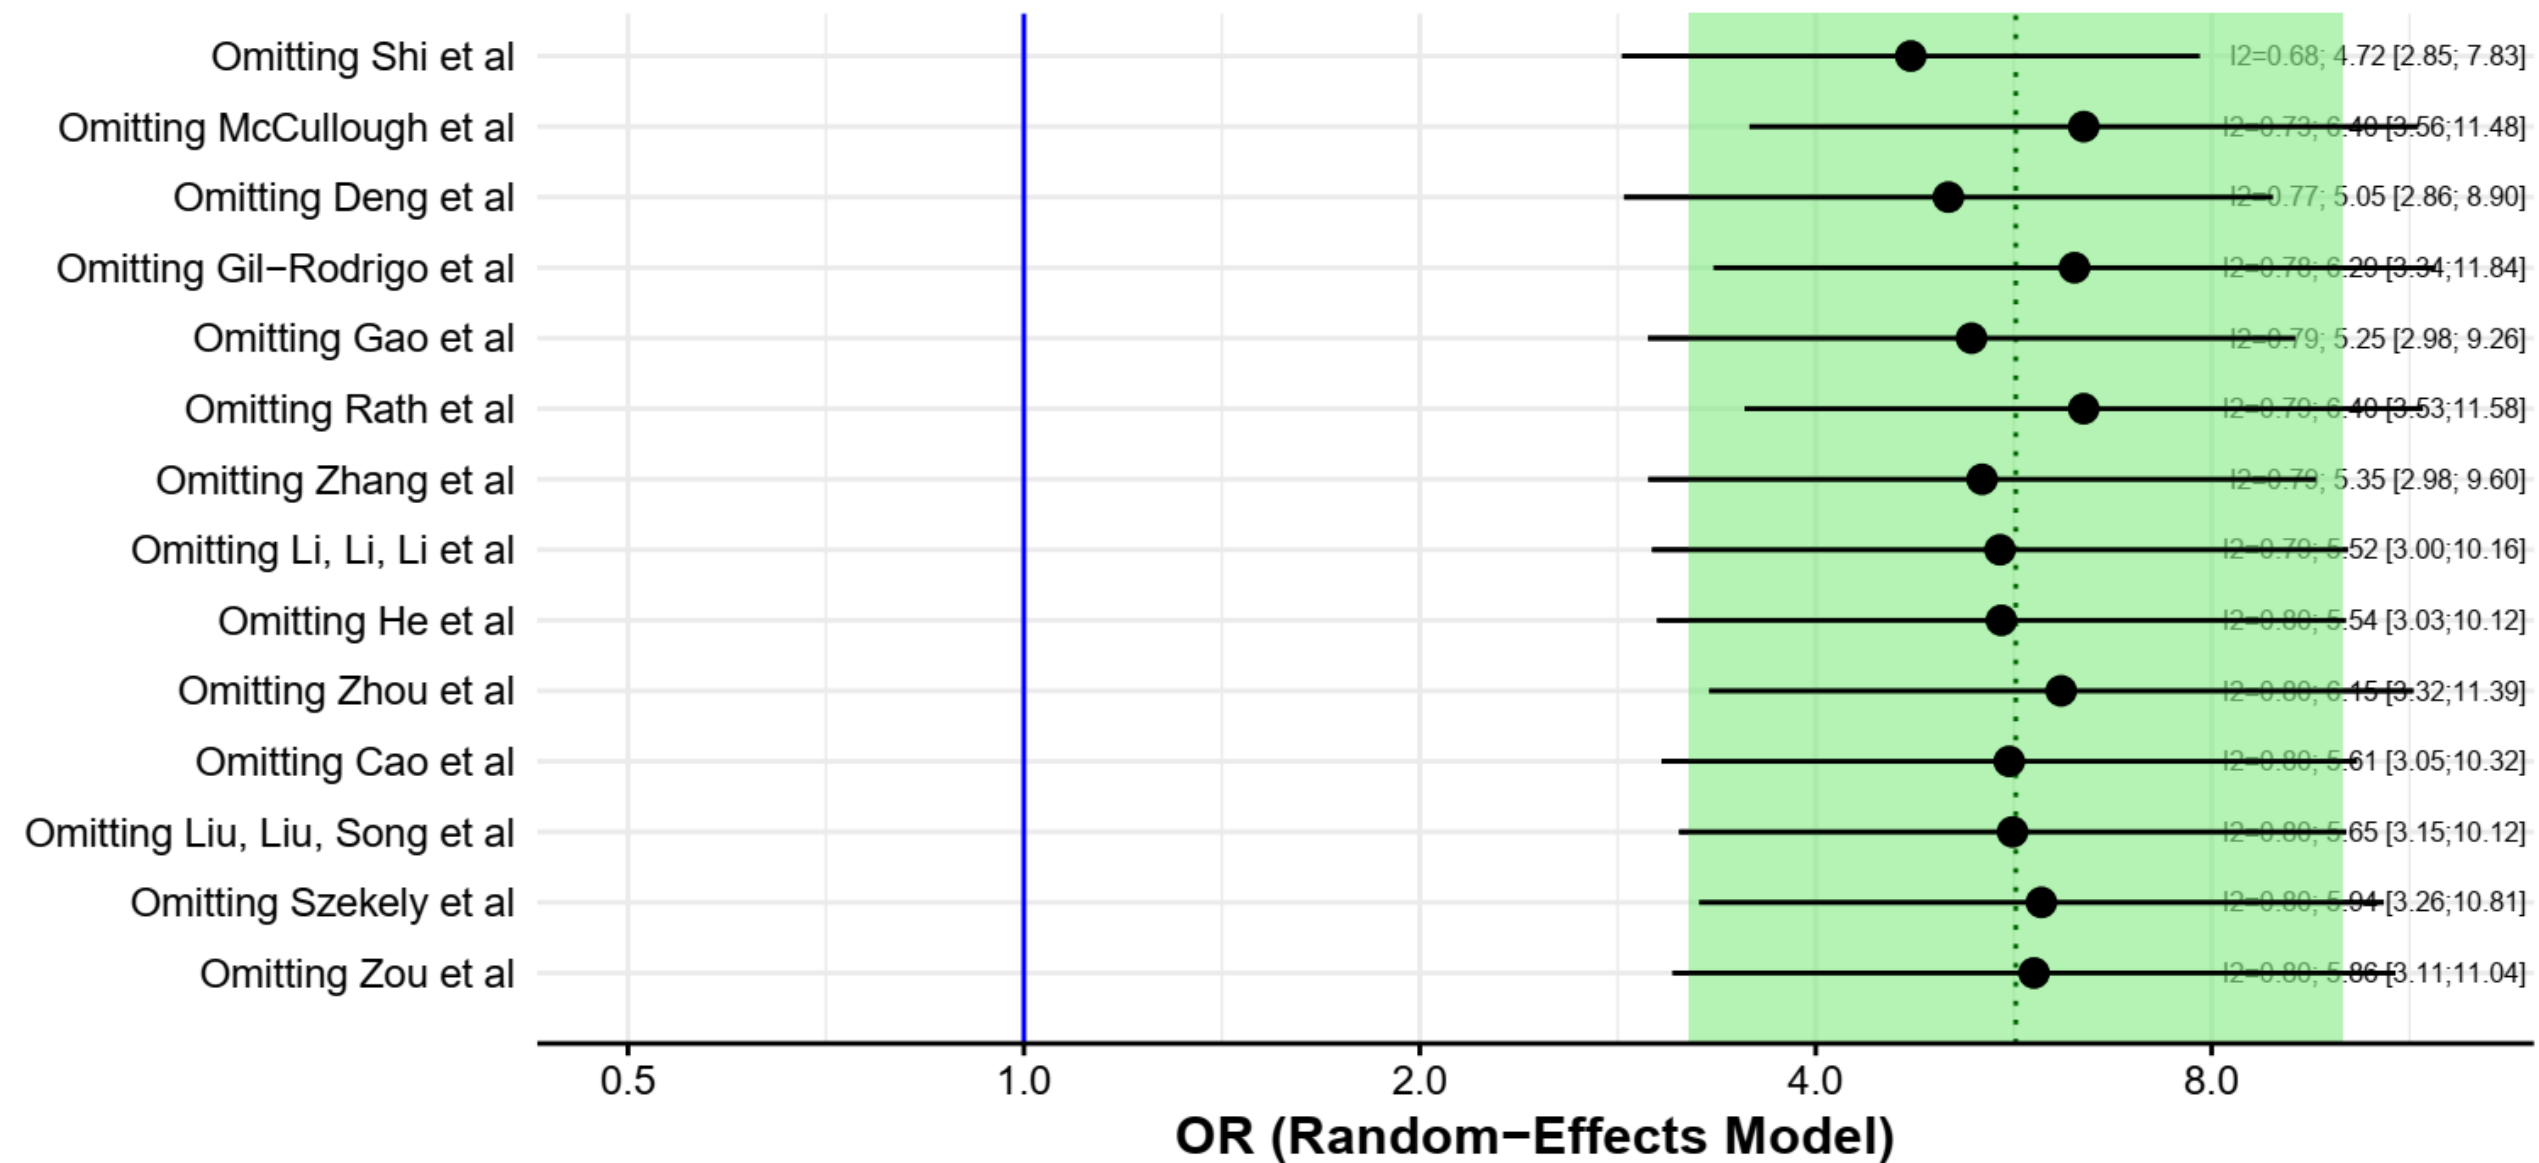

## Leave-One-Out Analysis (Sorted by I2)

|                               | Effect | LLCI  | ULCI   | I2    |
|-------------------------------|--------|-------|--------|-------|
| Omitting Shi et al            | 4.725  | 2.850 | 7.834  | 0.679 |
| Omitting McCullough et al     | 6.396  | 3.562 | 11.484 | 0.730 |
| Omitting Deng et al           | 5.046  | 2.859 | 8.905  | 0.767 |
| Omitting Gil-Rodrigo et al    | 6.292  | 3.345 | 11.838 | 0.785 |
| Omitting Gao et al            | 5.255  | 2.982 | 9.261  | 0.787 |
| Omitting Rath et al           | 6.395  | 3.532 | 11.581 | 0.787 |
| Omitting Zhang et al          | 5.353  | 2.984 | 9.604  | 0.793 |
| Omitting Li, Li, Li et al     | 5.524  | 3.003 | 10.160 | 0.795 |
| Omitting He et al             | 5.537  | 3.030 | 10.116 | 0.797 |
| Omitting Zhou et al           | 6.147  | 3.318 | 11.388 | 0.798 |
| Omitting Cao et al            | 5.613  | 3.054 | 10.318 | 0.799 |
| Omitting Liu, Liu, Song et al | 5.646  | 3.149 | 10.123 | 0.801 |
| Omitting Szekely et al        | 5.939  | 3.261 | 10.814 | 0.801 |
| Omitting Zou et al            | 5.862  | 3.114 | 11.038 | 0.801 |

# Influence plot of all cohort studies

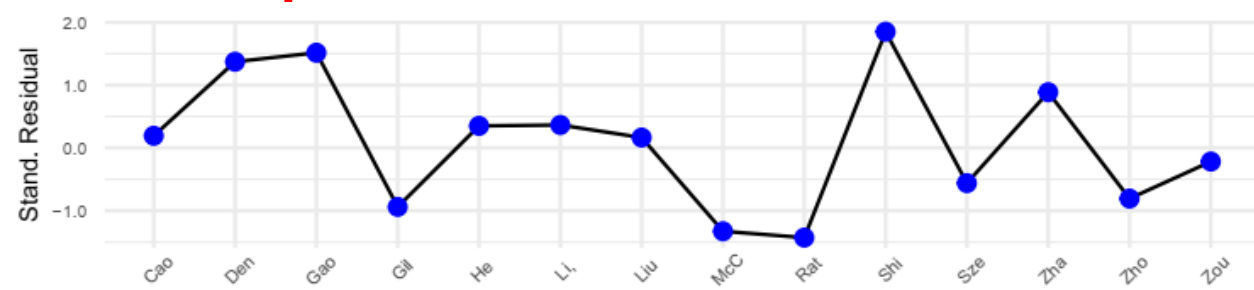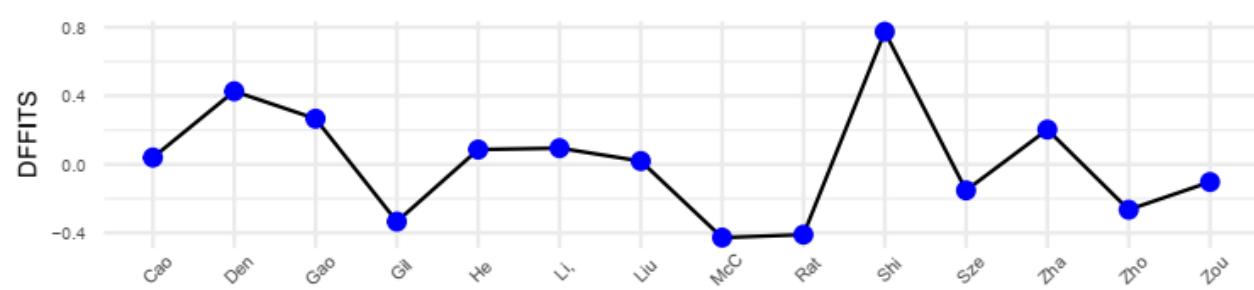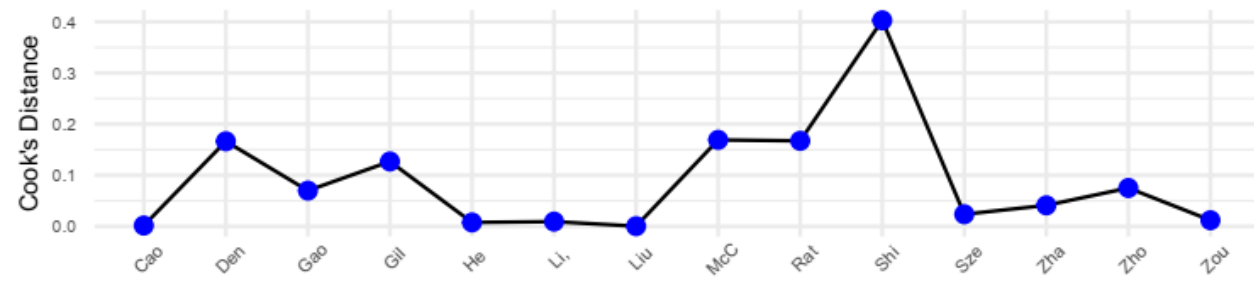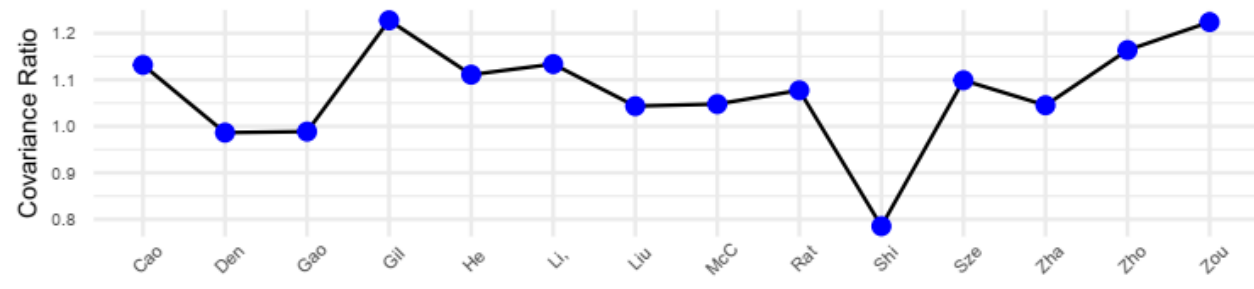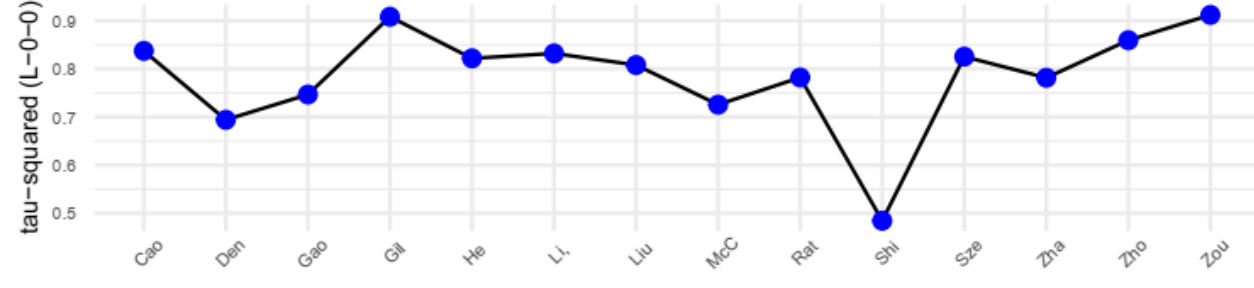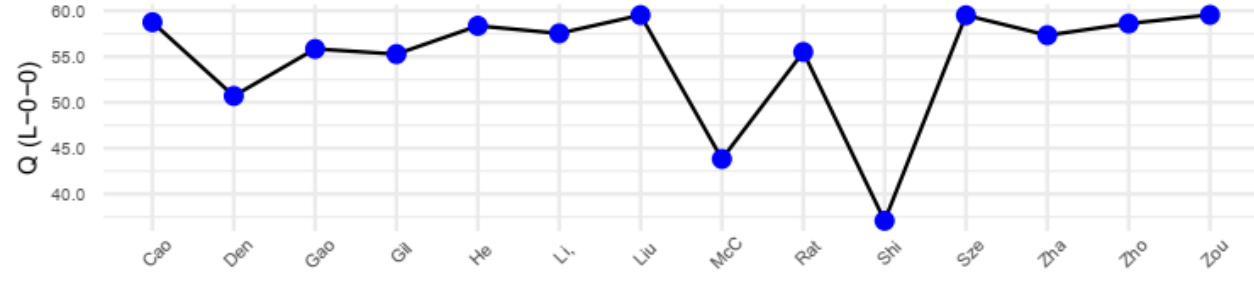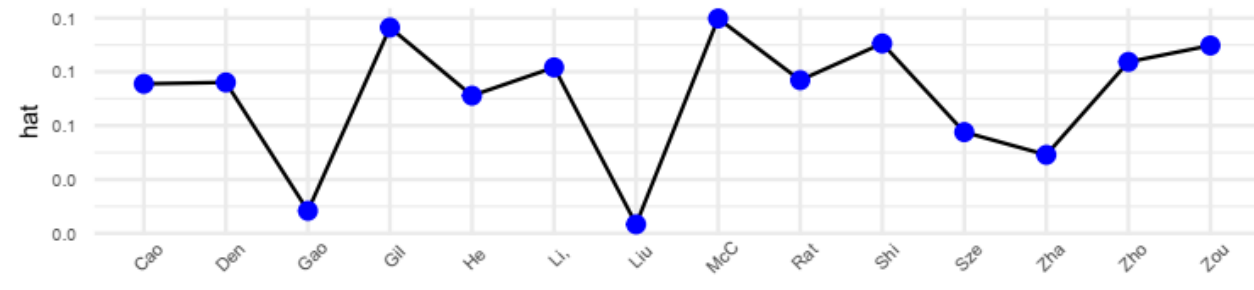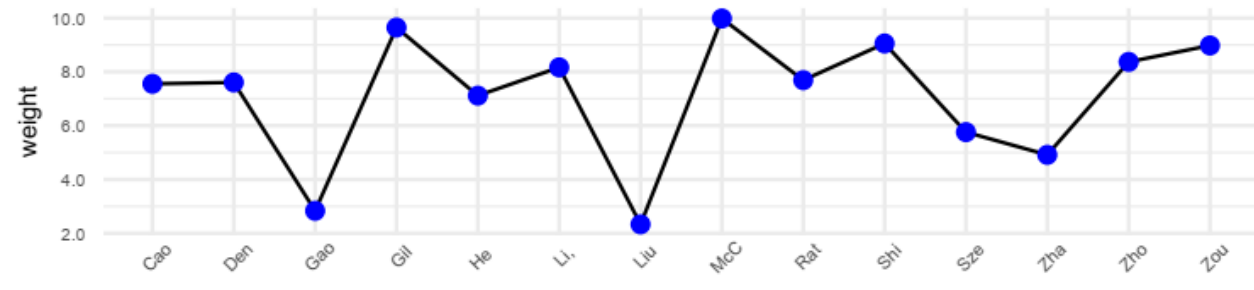



## Influence Diagnostics

-----

|                               | rstudent | dffits | cook.d | cov.r | QE.del | hat   | weight | infl |
|-------------------------------|----------|--------|--------|-------|--------|-------|--------|------|
| Omitting Cao et al            | 0.193    | 0.040  | 0.002  | 1.132 | 58.748 | 0.076 | 7.555  |      |
| Omitting Deng et al           | 1.371    | 0.426  | 0.166  | 0.986 | 50.697 | 0.076 | 7.606  |      |
| Omitting Gao et al            | 1.514    | 0.266  | 0.070  | 0.988 | 55.835 | 0.028 | 2.835  |      |
| Omitting Gil-Rodrigo et al    | -0.939   | -0.334 | 0.127  | 1.228 | 55.272 | 0.096 | 9.646  |      |
| Omitting Li, Li, Li et al     | 0.364    | 0.095  | 0.009  | 1.134 | 57.529 | 0.082 | 8.165  |      |
| Omitting Liu, Liu, Song et al | 0.164    | 0.019  | 0.000  | 1.043 | 59.526 | 0.023 | 2.333  |      |
| Omitting McCullough et al     | -1.327   | -0.427 | 0.169  | 1.048 | 43.823 | 0.100 | 9.983  |      |
| Omitting Rath et al           | -1.428   | -0.410 | 0.167  | 1.077 | 55.500 | 0.077 | 7.689  |      |
| Omitting Shi et al            | 1.848    | 0.774  | 0.403  | 0.785 | 37.082 | 0.091 | 9.053  |      |
| Omitting Szekely et al        | -0.561   | -0.152 | 0.024  | 1.099 | 59.505 | 0.058 | 5.759  |      |
| Omitting He et al             | 0.350    | 0.086  | 0.008  | 1.111 | 58.356 | 0.071 | 7.115  |      |
| Omitting Zhang et al          | 0.886    | 0.203  | 0.041  | 1.045 | 57.330 | 0.049 | 4.914  |      |
| Omitting Zhou et al           | -0.807   | -0.265 | 0.075  | 1.164 | 58.602 | 0.084 | 8.369  |      |
| Omitting Zou et al            | -0.218   | -0.103 | 0.012  | 1.224 | 59.550 | 0.090 | 8.978  |      |

Note how Shi et al and McCullough et al are outliers. (Baujat Plot)

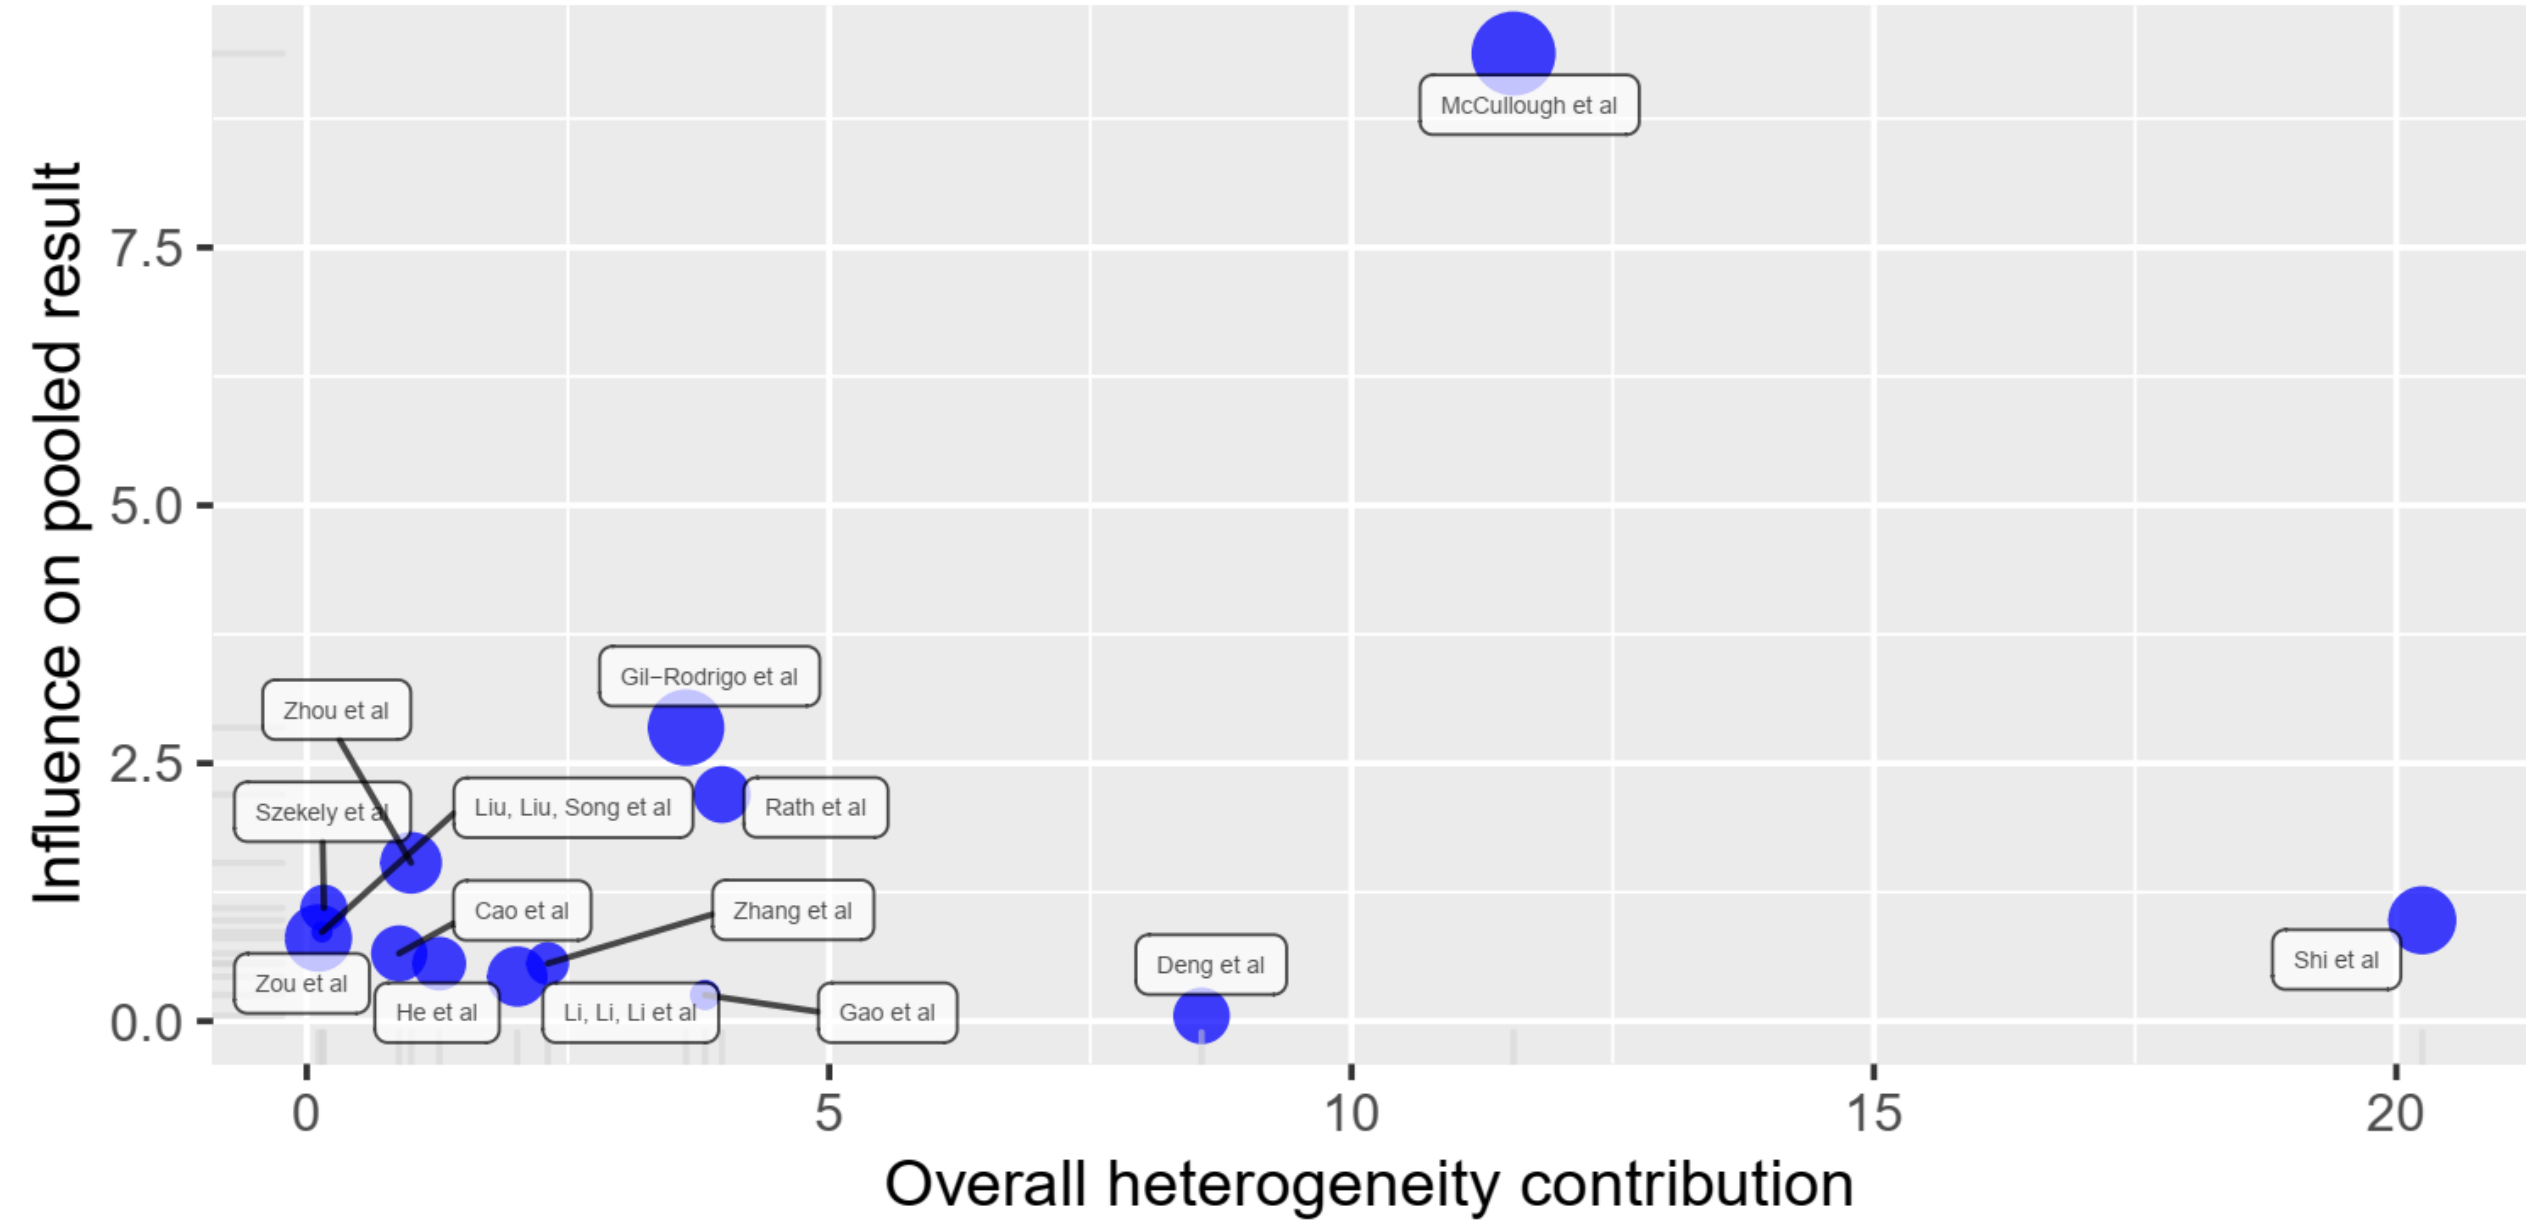

# Baujat Diagnostics (sorted by Heterogeneity Contribution)

---

|                               | HetContrib | Influence | EffectSize |
|-------------------------------|------------|-----------|------------|
| Omitting Shi et al            | 20.248     |           | 0.978      |
| Omitting McCullough et al     | 11.551     |           | 9.380      |
| Omitting Deng et al           | 8.564      |           | 0.052      |
| Omitting Rath et al           | 3.974      |           | 2.197      |
| Omitting Gao et al            | 3.812      |           | 0.253      |
| Omitting Gil-Rodrigo et al    | 3.630      |           | 2.845      |
| Omitting Zhang et al          | 2.306      |           | 0.559      |
| Omitting Li, Li, Li et al     | 2.015      |           | 0.432      |
| Omitting He et al             | 1.268      |           | 0.557      |
| Omitting Zhou et al           | 0.998      |           | 1.535      |
| Omitting Cao et al            | 0.884      |           | 0.656      |
| Omitting Szekely et al        | 0.164      |           | 1.096      |
| Omitting Liu, Liu, Song et al | 0.146      |           | 0.864      |
| Omitting Zou et al            | 0.111      |           | 0.805      |
